## The 5'-NAD cap of RNAIII modulates toxin production in *Staphylococcus aureus* isolates.

1 **Hector Gabriel Morales-Filloy<sup>1</sup>, Yaqing Zhang<sup>1</sup>, Gabriele Nübel<sup>1</sup>, Shilpa Elizabeth George<sup>2</sup>,**  
2 **Natalya Korn<sup>2</sup>, Christiane Wolz<sup>2</sup>, Andres Jäschke<sup>1\*</sup>**

3 <sup>1</sup> Institute of Pharmacy and Molecular Biotechnology (IPMB), Heidelberg University, Heidelberg,  
4 Germany

5 <sup>2</sup> Interfaculty Institute of Microbiology and Infection Medicine, University of Tübingen, Tübingen,  
6 Germany

7 **\* Correspondence:**

8 Prof. Dr. Andres Jäschke

9 [jaeschke@uni-hd.de](mailto:jaeschke@uni-hd.de)

### 10 **1 Abstract**

11 Nicotinamide adenosine dinucleotide (NAD) has been found to be covalently attached to the 5'-  
12 ends of specific RNAs in many different organisms, but the physiological consequences of this  
13 modification are largely unknown. Here we report the occurrence of several NAD-RNAs in the  
14 opportunistic human pathogen *Staphylococcus aureus*. Most prominently, RNAIII, a central  
15 quorum-sensing regulator of this bacterium's physiology, was found to be 5'-NAD-capped to a  
16 significant extent. NAD incorporation efficiency into RNAIII was found to depend *in vivo* on the -  
17 1 position of the P3 promoter. Reduction of RNAIII's NAD content led to a decreased expression  
18 of alpha- and delta-toxins, resulting in reduced cytotoxicity of the modified strains. These effects  
19 to not seem to be due to changes in RNAIII's secondary structure upon NAD attachment, as  
20 indicated by largely unaltered patterns in *in vitro* chemical probing experiments. Our study  
21 represents a large step towards establishing a biological function of the 5'-NAD cap, which for  
22 RNAIII in *S. aureus* is to modulate the expression of virulence factors.

### 23 **2 Importance**

24 Numerous organisms, including bacteria, are endowed with a 5'-NAD cap in specific RNAs. While  
25 the presence of the 5'-NAD cap modulates the stability of the modified RNA species, a significant  
26 biological function and phenotype have not been assigned so far. Here, we show the presence of  
27 a 5'-NAD cap in RNAIII from *S. aureus*, a dual-function regulatory RNA involved in quorum-sensing  
28 processes and regulation of virulence factor expression. We also demonstrate that altering the  
29 natural NAD modification ratio of RNAIII leads to a decrease in exotoxin production, thereby  
30 modulating bacterium's virulence. Our work unveils a new layer of regulation of RNAIII and the  
31 *agr* system that might be linked to the redox state of the NAD molecule in the cell.

### 32 **3 Introduction**

33 The discovery of the nicotinamide adenosine dinucleotide (NAD) bacterial 5'-cap in regulatory  
34 RNAs in *Escherichia coli* (Cahová, Winz, Höfer, Nübel, & Jäschke, 2015) challenged a long-standing  
35 dogma. To date, the 5'-NAD cap has been reported in Gram-negative and Gram-positive (*Bacillus*

36 *subtilis* (Frindert et al., 2018)) bacteria as well as in eukaryotes such as *Saccharomyces cerevisiae*  
37 (Kellner et al., 2014; Walters et al., 2017), the mammalian cell line HEK293T (Jiao et al., 2017) and  
38 plants from the genus *Arabidopsis* (Wang et al., 2019; Zhang et al., 2019). This novel nucleotide  
39 modification in RNA appears to be present in most organisms if not ubiquitous. However, no  
40 NAD-modified RNA has been reported in pathogens yet. The opportunistic pathogen  
41 *Staphylococcus aureus* is a gram-positive bacterium responsible for the majority of nosocomial  
42 infections (David & Daum, 2010). After the invasion of host tissue, *S. aureus* can cause  
43 bacteremia, sepsis, endocarditis, and toxic shock syndrome (Lowy, 1998). The pathogenicity of *S.*  
44 *aureus* is strongly related to the expression of numerous virulence factors, many of which are  
45 under the control of the *agr* quorum-sensing system (Bronesky et al., 2016; Quave et al., 2016;  
46 Traber et al., 2008). The *agr* locus harbours two promoters (P2 and P3) located back to back in  
47 the chromosome (Janzon, Lofdahl, & Arvidson, 1989; Peng, Novick, Kreiswirth, Kornblum, &  
48 Schlievert, 1988) (Figure 1A). P3 encodes a regulatory RNA (RNAIII) that additionally contains a  
49 small open reading frame (ORF) for delta-toxin (Hld) (Janzon & Arvidson, 1990; Novick et al.,  
50 1993), whereas P2 regulates the transcription of a polycistronic RNA (RNAII) that encodes the Agr  
51 proteins Agr A/B/C/D (Figure 1A) (Novick et al., 1995). With this quorum-sensing mechanism, *S.*  
52 *aureus* senses the cell density based on the extracellular concentration of the self-produced  
53 autoinducer peptide (AIP) (Recsei et al., 1986). The AIP binds to the AgrC histidine kinase  
54 membrane receptor and activates AgrA regulator by phosphorylation (Figure 1A). AgrA~P  
55 activates transcription of the P2 and P3 promoters, producing RNAII and RNAIII, respectively  
56 (Figure 1A) (Bronesky et al., 2016; Koenig, Ray, Maleki, Smeltzer, & Hurlburt, 2004). AgrA~P  
57 furthermore activates transcription of phenol-soluble modulins (*psmA* and *psmB*) (Queck et al.,  
58 2008), which are small peptides with surfactant activity that contribute to cell membrane  
59 disruption and therefore to *S. aureus* cytotoxicity (M. Li et al., 2009; Peschel & Otto, 2013).  
60 RNAIII plays a crucial bifunctional role in the switch from the adhesion phase towards invasion  
61 (Bronesky et al., 2016; Koenig et al., 2004), which ultimately determines the infective behaviour  
62 of the bacterium. On the one hand, it inhibits translation of *rot* mRNA, which encodes for a  
63 repressor (Rot) that blocks the transcription of several toxins (Boisset et al., 2007; Geisinger,  
64 Adhikari, Jin, Ross, & Novick, 2006; Said-Salim et al., 2003). Also, RNAIII represses the expression  
65 of surface proteins, e.g., protein A or coagulase through an antisense mechanism (Boisset et al.,  
66 2007; Bronesky et al., 2016; Huntzinger et al., 2005). On the other hand, it activates the  
67 production of several hemolytic toxins, such as alpha-toxin (Hla) (Morfeldt, Taylor, von Gabain,  
68 & Arvidson, 1995) and the self-encoded Hld.  
69 The addition of the canonical N7-methyl guanosine (m<sup>7</sup>G) cap to the 5'-ends of eukaryotic mRNAs  
70 proceeds co-transcriptionally once the transcript has reached a length of ~25 nucleotides. The  
71 NAD cap is, however, incorporated in a different way in prokaryotes and probably in all  
72 organisms: the ubiquitous redox coenzyme NAD is incorporated as the very first nucleotide (*ab*  
73 *initio*) into RNA during transcription initiation by the RNA polymerase, acting as a non-canonical  
74 initiating nucleotide (NCIN) that competes with ATP at A-initiating promoters (Bird et al., 2016;  
75 Frindert et al., 2018). Thus, transcription appears to constitute the primary source of 5'-NAD-  
76 RNAs in the cell. NAD incorporation into RNA has furthermore been demonstrated to strongly  
77 depend on the promoter sequence around the transcription start site (TSS) (Frindert et al., 2018;  
78 Vvedenskaya et al., 2018). In *E. coli* and *B. subtilis*, the -1 position turned out to be the most  
79 important one for NAD incorporation, likely due to pseudo-base-pairing between the

80 nicotinamide moiety of NAD and the nucleotides at the -1 position of the DNA non-coding strand  
81 (thymidine (T) and cytidine (C)) (Vvedenskaya et al., 2018).

82 The functions of the NAD cap are not yet fully understood, but in prokaryotes, it seems to confer  
83 stability to RNA. In *E. coli*, the NAD cap protects RNA against 5'-processing by the RNA-  
84 pyrophosphohydrolase (RppH) and thereby against RNaseE degradation (Cahová et al., 2015),  
85 whereas in *B. subtilis*, it stabilises RNA against exoribonucleolytic attack by RNase J1 (Frindert et  
86 al., 2018). Furthermore, *E. coli* possesses an NAD-decapping machinery based on the Nudix  
87 phosphohydrolase NudC (Frick & Bessman, 1995), which efficiently hydrolyses the NAD cap and  
88 leaves a 5'-monophosphate RNA (p-RNA) (Cahová et al., 2015). Despite Nudix hydrolase motifs  
89 being present in several enzymes of *S. aureus*, no NudC ortholog has been found to date. In  
90 mammalian cells, the NAD-decapping machinery works in a very different way. The DXO enzymes  
91 first remove the entire NAD cap from an mRNA (releasing NAD and p-RNA) and then proceed  
92 with exonucleolytic mRNA decay (Jiao et al., 2017).

93 In this study, we reveal by NAD captureSeq the presence of NAD-capped mRNAs and regulatory  
94 RNAs in the opportunistic pathogen *S. aureus*. The highly expressed, multifunctional, protein-  
95 coding, and regulatory RNA, RNAIII, is found to bear the NAD cap. Additionally, we study the  
96 importance of the -1 and +1 positions of the P3 promoter for the incorporation of NAD into RNAIII  
97 *in vivo*. Finally, we also investigate the consequences of changing RNAIII's NAD modification ratio  
98 on *S. aureus* virulence. The obtained results are interpreted in the context of the current  
99 knowledge of *S. aureus*'s pathobiology.

## 100 **4 Results**

### 101 **4.1 *S. aureus* possesses NAD-capped RNAs.**

102 To detect and quantify NAD-capped RNAs in *S. aureus*, Liquid Chromatography coupled with Mass  
103 Spectrometry (LC-MS) analysis of total RNA samples was carried out. Two RNA samples from *S.*  
104 *aureus* ATCC 25923 were washed extensively to remove contaminating free NAD before  
105 enzymatic treatment with *E. coli* NudC and alkaline phosphatase. Upon this treatment, NAD-RNAs  
106 will liberate N-ribosyl nicotinamide (r-NA) that can be sensitively detected by MS analysis. The  
107 results revealed an average amount of  $25.25 \pm 1.64$  fmol of NAD-RNA per microgram of RNA,  
108 which corresponds to an estimated amount of  $897 \pm 58$  NAD-RNA molecules per cell (Table S1)  
109 (Chen, Kowtoniuk, Agarwal, Shen, & Liu, 2009). These results indicated the presence of NAD-  
110 capped RNAs in *S. aureus*.

111 In order to identify NAD-capped RNAs, NAD captureSeq was performed (Winz et al., 2017) Total  
112 RNA from *S. aureus* ATCC 25923 (isolated at the late exponential phase) was treated per duplicate  
113 either with ADP-ribosyl cyclase (ADPRC), allowing selective biotinylation of NAD-RNA, or mock-  
114 treated (minus ADPRC control). The captured RNAs were reverse transcribed and PCR-amplified  
115 to generate a DNA library for Illumina sequencing (Figure S1A). The distribution of the obtained  
116 normalised mapped reads revealed 96.87% mRNAs, 2.46% tRNAs, and 0.68% rRNAs with  
117 enrichment values up to 50-fold. Enriched hits ( $P < 0.05$ , log<sub>2</sub>-fold change  $> 2$ , base mean  $> 10$ )  
118 were visualised with the Integrated Genome Browser (Nicol, Helt, Blanchard, Raja, & Loraine,  
119 2009) to identify reads that clustered at the 5'-ends of transcripts initiating with adenosine (+1A)  
120 (Figure 1B). 67.7% of the initial enriched hits (21 out of 31) had these properties (Table S2) and

121 are indicated as green dots in the upper right sector of the scatter plot (Figure 1B). The TSS  
122 analysis of the enriched hits showed T (61.9%) or A (28.6%) at position -1 of the promoter  
123 predominantly. G or T usually occupy the +2 position with the same occurrence (33.3%) whereas  
124 +3 position is dominated by A (57.1%). The predominant nucleobase at position -3 and -2 of the  
125 promoter was A (71.4% and 47.6% respectively, Figure S1B). Most enriched RNAs turned out to  
126 be mRNA 5'-fragments (Table S2). However, the most abundant and the most enriched hit was  
127 the bifunctional RNAIII (*hld*/RNAIII gene, Figure 1B, green star). Notably, the other transcript from  
128 the agr locus, RNAII, which has a similar promoter and is reported to also initiate with A (Novick  
129 et al., 1995; Reynolds & Wigneshweraraj, 2011), was not enriched at all (Figure 1B, red star).

#### 130 **4.2 The multifaceted regulatory RNAIII contains a 5'-NAD cap.**

131 The obtained reads for *hld*/RNAIII gene mapped clearly on its 5'-UTR (Figure 1C). As NAD  
132 captureSeq does not use a fragmentation step and size-selects (at the very end, after PCR  
133 amplification) amplicons that correspond to RNAs < ~170 nt, information about full-length mRNA  
134 species cannot be obtained from these data. To quantitatively investigate the length distribution  
135 of NAD-RNAIII, qPCR was performed on the enriched cDNA obtained directly from reverse  
136 transcription, before any amplification or size fractionation using gene-specific primers (Table S3)  
137 targeting different regions of RNAIII, thereby comparing the cDNA from the NAD captureSeq  
138 sample with the mock-treated negative control. The qPCR data revealed the most substantial  
139 enrichment for the 5'-end region, but a significant presence and enrichment of full-length RNAIII  
140 (Figure 1D). Northern blot analysis (which is independent of the nature of the 5'-end) indicated  
141 that overall, RNAIII in *S. aureus* is predominantly full-length (Figure S1C).  
142 To confirm that the NAD is covalently linked to RNAIII's 5'-end, RNAIII (enriched) and 5SrRNA  
143 (non-enriched, negative control) were specifically isolated from *S. aureus* total RNA by pull-down  
144 using biotinylated complementary oligonucleotides. Afterwards, RNAs were quantified, treated  
145 with NudC and alkaline phosphatase, and the small-molecule fraction analysed by LC-MS (Figure  
146 1E). This analysis revealed an intensive peak corresponding to nicotinamide ( $m/z = 122.81$ ,  
147 originating from r-NA,  $m/z = 254.94$ ) in the case of RNAIII, whereas for 5SRNA the same peak  
148 could only be detected at 24-fold higher input RNA concentration (Figure 1F). The NAD  
149 modification ratio, i.e., the percentage of molecules of that RNA species that carry the 5'-NAD-  
150 modification, of RNAIII and 5SRNA was calculated as 36.20% and 0.25%, respectively (Figure 1F).

#### 151 **4.3 Guanosine at position -1 of the P3 promoter increases NAD incorporation into RNAIII in** 152 **vivo.**

153 To investigate the biological consequences of 5'-NAD modification in vivo, *S. aureus* strains that  
154 differ strongly in their content of 5'-NAD-RNAIII, with as little as possible differences in the  
155 transcriptome, had to be generated. Toward this end, we complemented a strain devoid of the  
156 *hld*/RNAIII gene (*S. aureus* HG001  $\Delta$ RNAIII) with plasmids based on the shuttle vector pCG-246  
157 (Helle et al., 2011). These plasmids carried the *hld*/RNAIII gene behind different promoters: pCG-  
158 P3 carried the native P3 promoter, while pCG-P3(-1G) had a mutated version of this promoter (-  
159 1T to -1G). To unravel whether the lack of NAD captureSeq enrichment of RNAII was due to  
160 properties of its promoter, construct pCG-P2 was generated in which the P2 promoter controlled

161 the RNAIII native sequence (Figure 2A). Unlike the previously used *S. aureus* ATCC 25923, in the  
162 generated strains the *hld*/RNAIII gene is located on a plasmid.

163 To detect variations in RNAIII's modification ratio, we analysed RNAIII pulled down from total  
164 RNA from the RNAIII-complemented *S. aureus* strains by acryloaminophenyl boronic acid (APB)  
165 gel electrophoresis that separates 5'-NAD-RNA from 5'-p and 5'-ppp-RNA, combined with  
166 Northern blot (Alwine, Kemp, & Stark, 1977; Igloi & Kossel, 1985; Nübel, Sorgenfrei, & Jäschke,  
167 2017). As the full-length RNAIII was too long for efficient separation and precise quantification  
168 (Figure S1D), a pre-treatment with a designed DNAzyme was introduced which cleaved RNAIII to  
169 yield 125 nt 5'-terminal fragments (Figure 2B). The strains containing pCG-P2 showed no NAD  
170 incorporation into the RNAIII transcript at all, whereas RNAIII in pCG-P3 and pCG-P3(-1G)-  
171 transformed strains showed an average NAD-modification ratio of  $9.82 \pm 0.15\%$  and  $24.91 \pm$   
172  $0.37\%$ , respectively (Figure 2C). Indeed, *S. aureus* pCG-P(-1G) was found to have a significantly  
173 higher amount of NAD-RNAIII than *S. aureus* pCG-P3 (*t*-test;  $P < 0.0001$ ), demonstrating the  
174 importance of the -1 mutation on NAD incorporation efficiency, which confirms findings in other  
175 microorganisms (Frindert et al., 2018; Vvedenskaya et al., 2018). In all RNAIII samples, the slower-  
176 migrating band disappeared upon treatment with *E. coli* NudC, further supporting the nature of  
177 the 5'-modification as NAD (Figure 2C).

178 To test whether this different NAD modification percentage in the three RNAIII constructs (pCG-  
179 P3, pCG-P2, pCG-P3(-1G)) is also reflected in NAD captureSeq enrichment, we had to modify the  
180 analysis to allow quantitative comparisons between different RNA species by adding pure NAD-  
181 RNA spike-in controls of five different lengths as internal standards (IS; 61, 104, 205, 302 and 400  
182 nt, Table S4) to allow for normalization. The NGS results revealed that the NAD capture efficiency  
183 of the IS between the samples was very similar (Figure 2D, one-way ANOVA;  $P = 0.8617$ ). When  
184 comparing the *hld*/RNAIII enrichment in the different *S. aureus* strains, pCG-P3(-1G)  
185 ( $\log_2\text{FoldChange} = 3.57$ ) showed higher enrichment than *S. aureus* pCG-P3 ( $\log_2\text{FoldChange} =$   
186  $2.77$ ). In the case of *S. aureus* pCG-P2, no enrichment was found for *hld*/RNAIII ( $\log_2\text{FoldChange}$   
187  $= 0.48$ ). Thus, the NGS data support the results obtained by APBgel - Northern blot analysis and  
188 confirm that a -1G in the P3 promoter significantly enhances NAD incorporation into RNAIII (*t*-  
189 test;  $P = 0.036$ , Figure 2E). Analysis of the NAD captureSeq data from the three mutant strains  
190 revealed a similar pattern of NADylation as in the ATCC 25923 wild type strain (Table S5, Table  
191 S6 and Table S7). For pCG-P3 we obtained 11 enriched hits (4 of them common with the wild  
192 type), in pCG-P3(-1G) 12 (4 commons), and pCG-P2 6 (3 commons).

#### 193 **4.4 The TSS of the P2 promoter is guanosine.**

194 We were puzzled by the observation that RNAIII from strain pCG-P2 seemed to contain no NAD  
195 at all. Sanger sequencing data after cRT-PCR (Slomovic & Schuster, 2013), however, provided a  
196 straightforward explanation: the transcription start site of the P2 promoter was a G instead of  
197 the previously reported A (Novick et al., 1995; Reynolds & Wigneshweraraj, 2011), and NAD does  
198 not compete with GTP in transcription initiation. The analysis of 96 sequencing reactions (96  
199 single colonies from each strain) from *S. aureus* pCG-P3 and pCG-P2 yielded well-defined 3' and  
200 5' ends of RNAIII, where the RNAIII's first nucleotide was +1A when transcribed from the P3  
201 promoter, and +1G in the case of the P2 promoter (Figure 2F). A +1G was also found in RNAII (a

202 natural product of P2 promoter) from *S. aureus* HG001 wild type strain after the analysis of 10  
203 Sanger sequencing reactions (10 single colonies, Figure 2F).

#### 204 **4.5 The 5'-NAD cap of RNAIII affects Hla and Hld expression levels and thereby *S. aureus*'s** 205 **cytotoxicity.**

206 To study the accessibility of its NAD-5'-end, <sup>32</sup>P-body-labelled pure NAD-RNAIII was subjected to  
207 *in vitro* cleavage with *E. coli* NudC. After 20 min of incubation at 37 °C, NudC had decapped ~65%  
208 of the RNAs, and this value did not change upon further incubation (up to 1 hour, Figure 3A). An  
209 additional unfolding-folding cycle, followed by the addition of fresh NudC, increased decapping  
210 to ~83% (Figure 3A), suggesting that a fraction of NAD-RNAIII exists in a structure that is not  
211 susceptible to NudC cleavage, e.g., with the 5'-end involved in a double-strand (Höfer, Abele,  
212 Schlotthauer, & Jäschke, 2016).

213 To test the effect of the promoter mutations on the biosynthesis rate of RNAIII, a qPCR assay was  
214 performed with cDNA from the different *S. aureus* strains (total RNA harvested in late  
215 exponential phase and reverse transcribed). The assay revealed no significant difference in RNAIII  
216 content between pCG-P3 and pCG-P3(-1G) strains (*t*-test; *P* = 0.1221, Figure 3B). On the other  
217 hand, pCG-P2 showed a significantly lower amount of RNAIII than pCG-P3 (*t*-test; *P* = 0.0276,  
218 Figure 3B).

219 Strains pCG-P3 and P3(-1G) differ only in one nucleotide, the -1 position of the P3 promoter,  
220 which leads to the same RNAIII transcript, just with different NAD modification levels. To test the  
221 influence of this single mutation on the transcriptome; RNA-Seq was performed on total RNA  
222 from both strains. Their transcriptomes were found to be very similar to each other, with only 4  
223 upregulated genes (*splA*, *splB*, *splC*, *splD*, all of them coding for serine proteases, Table S8) and 2  
224 downregulated genes (*spa*, an uncharacterized gene with homology to *ssaA*, Table S8) in *S.*  
225 *aureus* pCG-P3(-1G). The *splABCD* operon is known to be activated via RNAIII, whereas *spa* is  
226 known to be inhibited by RNAIII (Queck et al., 2008). Thus, the higher NADylation in pCG-P3(-1G)  
227 might enhance RNAIII's inhibitory activity. Interestingly, the prototypic RNAIII target gene, *hla*,  
228 was neither upregulated nor downregulated in the RNA-Seq data. Hence, we speculated that  
229 NADylation of RNAIII may influence the translation of Hla, and therefore, an analysis of Hla  
230 abundance in culture supernatants was conducted. The Hla obtained in culture filtrates of *S.*  
231 *aureus* pCG-P3(-1G) was significantly lower than in *S. aureus* pCG-P3 in late exponential phase  
232 cultures (*t*-test; *P* = 0.0148, Figure 3C and Figure S1E). Thus, 5'-NAD capping of RNAIII might  
233 modulate the interaction between the 5'-UTRs of RNAIII and *hla* mRNA as well, leading to a lower  
234 translation of the latter RNA.

235 We next analysed whether NADylation impacts the translation efficiency of the RNAIII-encoded  
236 Hld. According to LC-MS of culture filtrates, half the amount of Hld was found in pCG-P3(-1G)  
237 (with the higher amount of 5'-NAD cap) compared to pCG-P3 (Figure 3C, Figure S1F). This finding  
238 indicates that RNAIII's 5'-NAD cap might impair *hld* mRNA translation. A decreased production of  
239 two major hemolytic toxins, Hla and Hld, should lead to a less cytotoxic *S. aureus* strain. Indeed,  
240 an assay with *S. aureus* pCG-P3 and pCG-P3(-1G) culture supernatants in a human THP1  
241 macrophage line (Figure 3D) revealed a significantly reduced cytotoxicity of pCG-P3(-1G)  
242 compared to pCG-P3 (Tukey's multiple comparisons-test; *P* = 0.0004).

#### 243 **4.6 Hld's Shine-Dalgarno sequence is accessible *in vitro* regardless of the presence of a 5'-** 244 **NAD cap.**

245 In order to analyse whether 5'-NAD capping of RNAIII affects the secondary structure of its 5'-  
246 domain, we performed Selective 2'-Hydroxyl Acylation and Primer Extension (SHAPE) (Weeks &  
247 Mauger, 2011; Wilkinson, Merino, & Weeks, 2006). SHAPE is an approach to probe the structure  
248 of every nucleotide within an RNA simultaneously. The SHAPE reagent chemically modifies  
249 (acylates) the 2'-OH position of flexible nucleotides (Wilkinson et al., 2006). A subsequent DNA  
250 synthesis by reverse transcriptase stops one nucleotide before the position of a modified 2'-  
251 ribose position, reporting the site of a SHAPE modification in the RNA (Weeks & Mauger, 2011;  
252 Wilkinson et al., 2006). 1-methyl-7-nitro-isatoic anhydride (1M7) was chosen as SHAPE reagent  
253 (Mortimer & Weeks, 2007). To determine whether RNAIII's secondary structure is modulated by  
254 the nature of its 5'-end, pure 5'-NAD-RNAIII and ppp-RNAIII were required. Pure full-length (514  
255 nt) NAD-RNAIII could not be prepared, as no method exists for its preparative separation from  
256 full-length ppp-RNAIII. Therefore, we first probed a shorter version of RNAIII consisting of  
257 nucleotides 1 to 113, designated as RNAIII leader, which could be prepared by *in vitro*  
258 transcription and APB-gel purification as pure NAD-capped (NAD-RNAIII leader), or pure  
259 triphosphorylated version (ppp-RNAIII leader). To exclude the possibility that the truncated  
260 RNAIII leader sequences fold differently than the full-length RNAIII, we compared in a second  
261 step pure full-length ppp-RNAIII with impure full-length NAD-RNA (containing NAD-RNA and ppp-  
262 RNA ~ 1:1). The SHAPE data showed very similar nucleotide reactivity profiles for NAD-RNAIII  
263 leader and ppp-RNAIII leader (Figure 4A, Figure 4B and Figure S1G), indicating an accessible SD  
264 sequence regardless of their 5'-end modification.

265 When shaping full-length ppp-RNAIII and the ppp-/NAD-RNAIII mixture, both the overall SHAPE  
266 reactivity profile and SD's accessibility were similar to that of the ppp-RNAIII leader (Figure 4C,  
267 Figure 4D)

## 268 **5 Discussion**

### 269 **5.1 A short, regulatory, and protein-coding NAD-capped RNA in *S. aureus*.**

270 In this study, we have demonstrated the existence of 5'-NAD-capped RNAs in the opportunistic  
271 pathogen *S. aureus*. Since the discovery of the prokaryotic NAD cap in 2015, the presence of NAD-  
272 RNAs in many different organisms has been confirmed, and this modification might be  
273 ubiquitous. Nevertheless, the biological function of the 5'-NAD cap in prokaryotes is still unclear.  
274 In the case of *B. subtilis*, also a gram-positive bacterium, the NAD cap stabilises RNA against  
275 exoribonucleolytic attack by RNase J1 *in vitro* (Frindert et al., 2018). As in other organisms  
276 (Cahová et al., 2015; Frindert et al., 2018), several mRNAs were found to be enriched in the NAD  
277 captureSeq of *S. aureus* ATCC 25923. Most of these mRNAs encode proteins involved in different  
278 cellular processes: redox reactions, membrane transport, biosynthesis-related enzymes,  
279 phosphatases, kinases, and hydrolases (Table S2). Similar classes were observed in the *S. aureus*  
280 mutant strains (pCG-P3, pCG-P3(-1G) and pCG-P2), with several hits common with the wild type  
281 ATCC 25923 strain, i.e., NADP reductases, synthetases, and transcription factors.

282 Interestingly, the mutant-specific hits encoded for proteins that were similar to the ones found  
283 in the wild type strain, especially reductases such as the peptide methionine sulfoxide reductase

284 or redox enzymes like the superoxide dismutase (Table S5, Table S6 and Table S7). Of particular  
285 interest is the enrichment of mRNAs that encode for NAD- NADP-utilizing enzymes (2-  
286 dehydropantoate 2-reductase, L-lactate dehydrogenase). A similar observation has been made  
287 in *B. subtilis*, where L-threonine 3-dehydrogenase (*tdh*) was enriched (Frindert et al., 2018). These  
288 findings underpin the possibility that some NAD-mRNAs might act as a cofactor of their encoded  
289 enzyme. Moreover, the NAD cap could act as an enzyme-binding site to its mRNA as an additional  
290 regulatory mechanism (Jaschke, Hofer, Nubel, & Frindert, 2016). However, the existence of this  
291 feedback mechanism still needs to be demonstrated empirically.

292 The *hld*/RNAIII gene was by far the most enriched of all hits. The results showed a higher NAD  
293 modification level of RNAIII in the wild type strain (~36%) compared to pCG-P3 (~10%). This  
294 phenomenon might be due to the different *S. aureus* strains used (ATCC 25923 and plasmid-  
295 carrying HG001) although these values were obtained by different approaches (LC-MS vs  
296 Northern blot). The variation in NAD content is supported by a different *hld*/RNAIII enrichment  
297 in NAD captureSeq between both strains after, with a higher value obtained in ATCC 25923 (Table  
298 S2, Table S5). Furthermore, a distinct NAD modification level on RNAIII could be the cause of  
299 some differences in the infective behaviour between the strains. Nevertheless, RNAIII is still  
300 strongly NAD-modified whenever transcribed by P3 promoter, and this together with its high  
301 expression level, its role as a crucial intracellular effector of the quorum-sensing system, and the  
302 additional presence of an embedded ORF for the *hld* gene (Figure 1A) make RNAIII a promising  
303 candidate for unveiling a biological function of the NAD cap.

## 304 **5.2 The P3 promoter acts as a driver of NAD incorporation.**

305 The -1 position of the P3 promoter is found to modulate the incorporation of NAD into the  
306 nascent RNAIII. We also tested the effect of a promoter exchange on NAD transcriptional  
307 incorporation. The other promoter of the *agr* locus, P2, seems not to be prone to introduce NAD  
308 into RNAII (Log2FC = -1.65 in NAD captureSeq). These two promoters share several  
309 characteristics: phosphorylated AgrA activates transcription of both, they have a suboptimal  
310 interspace region between the -35 and -10 boxes, and both have been predicted to initiate with  
311 a +1A (Novick et al., 1995; Reynolds & Wigneshweraraj, 2011). Placing the P2 promoter upstream  
312 of the RNAIII sequence led to the total abolishment of NAD incorporation into RNAIII (Figure 2C  
313 and Figure 2E). The unexpected revelation of the TSS of the P2 promoter being G instead of A  
314 (Figure 2E) provided us with an additional “NAD zero” control in our experiments, constituting a  
315 transcript that differed only in one nucleotide from the native one but was devoid of any 5'-NAD.  
316 This control further demonstrated that NAD captureSeq is not biased towards highly expressed  
317 RNAs unless they bear the NAD cap. Moreover, it also confirmed the reliability of the APBgel-  
318 Northern blot combination as a tool for analysing NAD-capped RNAs.

## 319 **5.3 NAD-RNAIII as a modulator of *S. aureus* physiology.**

320 For validating the function of RNAIII's NAD cap, it was essential that the RNAIII expression of the  
321 different *S. aureus* strains was not altered by the changes introduced in the promoter sequence.  
322 qPCR analysis confirmed the lack of bias in RNAIII content between *S. aureus* pCG-P3 and pCG-  
323 P3(-1G) (Figure 3B). This experiment also showed lower RNAIII levels in the pCG-P2 strain (Figure  
324 3B), which suggest that the P2 promoter is less active than the P3 promoter in these experiments.



325 This finding is in agreement with the fact that *in vitro*, AgrA-mediated activation of transcription  
326 is more prominent at P3 than at P2 (Reynolds & Wigneshweraraj, 2011). On the other hand, a  
327 recent *in vivo* study reported AgrA~P affinity to P2 to be higher than to P3, previously assessed  
328 by Koenig et al. (2004), and this differential affinity being crucial for the *agr* positive feedback  
329 loop (Garcia-Betancur et al., 2017).

330 According to transcriptome sequencing, the higher NAD modification ratio of RNAIII in *S. aureus*  
331 pCG-P3(-1G) (Figure 2C and Figure 2E) appears to downregulate the transcription of *spa* (protein  
332 A) and *ssaA* (staphylococcal secretory antigen SsaA) (Table S6). *SsaA* mRNA has been proposed  
333 (but not yet demonstrated) to base-pair with the 3'-end of RNAIII (Lioliou et al., 2016). *spa* mRNA  
334 is known to base-pair with RNAIII, in particular with helix 13 (Huntzinger et al., 2005), thereby  
335 blocking *spa*'s Shine-Dalgarno sequence, leading to *spa* mRNA translation repression and  
336 degradation by endoribonuclease III (Bronesky et al., 2016). While within the primary sequence  
337 helix 13 is far away from the NAD-5'-end, in one of the proposed secondary structures of RNAIII,  
338 the 5' and 3'-ends base-pair with each other (Novick et al., 1993), thereby localising the NAD in  
339 the vicinity of helix 13. Hence, it is conceivable that the 5'-NAD cap affects the folding of RNAIII  
340 and its interaction with the *spa* mRNA. A stronger interaction might lead to a decreased protein  
341 A production, which would ultimately favour the dissemination of *S. aureus* pCG-P3(-1G) isolates  
342 (Bronesky et al., 2016). Furthermore, four genes for a protease family occurring only in *S. aureus*,  
343 (*SplA/B/C/D* operon) (Reed et al., 2001) were upregulated in the strain with increased NAD-  
344 RNAIII. Also, the *Spl* operon is induced by the *agr*-system with a mechanism that has not been  
345 elucidated but that might involve RNAIII (Reed et al., 2001). The *Spl* proteases have been  
346 implicated in tissue dissemination processes due to their ability to degrade host proteins (Paharik  
347 et al., 2016). Noteworthy, a recent study reported a decrease in the amount of Hld in the spent  
348 medium obtained from an *S. aureus Spl* deletion mutant, suggesting a positive correlation  
349 between RNAIII and *Spl*. On the other hand, the  $\Delta Spl$  strain did not show alterations in Hla levels,  
350 proving that the *agr* system was not inhibited (Paharik et al., 2016).

351 At this point, one could expect that the upregulation in *Spl* proteases in pCG-P3(-1G) together  
352 with the downregulation of protein A and SsaA would generate a more invasive bacterium than  
353 pCG-P3. Nevertheless, evidence at protein level of these two targets would be necessary to  
354 predict more accurately the phenotypic effects.

355 Transcriptome sequencing did not reveal significant changes in another major target of RNAIII,  
356 namely *hla* (Log2FC = -0.14). However, as RNAIII activates translation of *hla* mRNA by base pairing  
357 between the 5'-UTRs of both RNAs (Morfeldt et al., 1995), an effect on the mRNA level of this  
358 gene was not expected.

359 On the protein level, the phenotypic effects were more notorious. Since pCG-P3(-1G) exhibits an  
360 upregulated *Spl* operon, an increase in Hld amount in supernatant could be expected. In contrast,  
361 a significant decrease of Hld in cell culture filtrates of *S. aureus* pCG-P3(-1G) was observed (Figure  
362 3C).

363 One explanation would be that the 5'-NAD cap in RNAIII might impair Hld translation. In  
364 eukaryotes, there are conflicting reports regarding the translatability of NAD-RNAs (Jiao et al.,  
365 2017; Wang et al., 2019), and there are no comparable data on prokaryotes which are not known  
366 to sense and require "cap" structures in translation. It has been suggested that the 3'-end of  
367 RNAIII blocks Hld translation by base-pairing with its Shine-Dalgarno (SD) sequence, making it  
368 inaccessible to ribosomes, thereby delaying the translation of Hld by 1h after RNAIII transcription

369 (Balaban & Novick, 1995). Thus, the 5'-NAD cap might favour the interaction between the 5'-end  
370 and and some downstream sequences due to the pseudo-base-pairing of the nicotinamide  
371 moiety of the initiating NAD, which has been proposed to base-pair with C and T of DNA in the  
372 open promoter (Vvedenskaya et al., 2018). Hence, it appears plausible that the 5'-NAD cap of an  
373 RNA interacts similarly with C and uridine (U) residues inside the same molecule. Nevertheless,  
374 even if one assumes that NAD-RNA is not translated while ppp-RNA is, this could not explain how  
375 a 15% reduction in ppp-RNAIII in pCG-P3(-1G) compared to pCG-P3 (Figure 2C) can cause a 50%  
376 decrease in translation product yield. We assume that this effect may be due to yet unknown  
377 factors that modulate *hld* translation.

378 In the case of Hla, the changes observed in pCG-P3(-1G) compared to pCG-P3 are slightly lower  
379 than for Hld (Figure 3C), which might imply a lower influence of the 5'-NAD-cap on the RNAIII-*hla*  
380 mRNA interaction than on RNAIII translation. Indeed, the fact that the H2 hairpin of RNAIII, which  
381 is the one predicted to interact with *hla* mRNA, is only nine nucleotides upstream of *hld*'s SD  
382 sequence suggests that both might be similarly affected by the 5'-NAD cap. Like in the case of  
383 Hld translation, nicotinamide's base-pairing flexibility might increase the probability of  
384 generating a 5'-end-3'-UTR duplex in RNAIII's secondary structure, sequestering both the SD  
385 sequence and H2 helix, and explaining the phenotypes obtained in *S. aureus* pCG-P3(-1G) (Figure  
386 3C and Figure 3D). Surprisingly, the *in vitro* analysis of RNAIII leader's secondary structure by  
387 SHAPE did not reveal differences related to the 5'-NAD cap (Figure 4A). In both RNAIII leader  
388 variants, the SD appeared to be accessible (Figure 4B). This structure would likely be compatible  
389 with translation of the embedded Hld ORF regardless of the presence of the 5'-NAD cap. Of note,  
390 the analysis was done with a shortened version of RNAIII with the aim of detecting the presence  
391 of a mechanism that would block co-transcriptional translation. Furthermore, SHAPE  
392 measurements with full-length RNAIII revealed an accessible SD sequence as well (Figure 4B,  
393 Figure 4C, Figure 4D), an observation already reported in the chemical probing of RNAIII  
394 performed by Benito et al. (2000). Our data suggest that the lack of RNAIII's 3'-domain would not  
395 exert any effect on Hld and Hla translation (Figure 4B, Figure S1G). In contrast, a mutant *S. aureus*  
396 strain with a truncated RNAIII devoid of its 3'-end domain (211 nt) showed an earlier Hld  
397 translation compared to the wild type strain (Balaban & Novick, 1995). Likewise, deletions within  
398 3'-end region of RNAIII also inhibit Hla expression (Novick et al., 1993). Thus, although the *in vitro*  
399 RNAIII SHAPE experiments do not explain the obtained phenotypes with decreased Hld and Hla,  
400 in a regulated cellular co-transcriptional translation environment, the 5'-NAD cap could cause  
401 some differences and, induce different phenotypes.

402 While RNAIII has been studied intensively as a central regulator of bacterial physiology, a large  
403 number of different targets affected by it, and the diversity of mechanisms of action make it  
404 rather unlikely that only one stable secondary structure induces all these responses. Instead,  
405 inside the cell likely exists an equilibrium between different folds, each of them suited for specific  
406 purposes (Benito et al., 2000). The existence of such alternative folds has been hinted at by the  
407 inaccessibility of a fraction of *in vitro-transcribed* NAD-RNAIII to NudC cleavage, and its  
408 modulation by an unfolding / folding cycle (Figure 3A). Thus, the existence in the cell of an RNAIII  
409 subpopulation that is sensitive to its 5'-modification state and is responsible for both *hld* and *hla*  
410 activation remains plausible (Balaban & Novick, 1995).

411 The fact that the RNAIII sequence is highly conserved among *S. aureus* strains led us to  
412 hypothesize that the incorporation of NAD into RNAIII should be strictly regulated and therefore

413 the evolution selected the -1T at P3 promoter. In such a way, *S. aureus* may ensure the right  
414 (intermediate) level of NAD incorporation into RNAIII and preserves its optimal ensemble of  
415 secondary structures. Assuming this, the 5'-NAD cap might serve as modulator of RNAIII's  
416 secondary structure. Moreover, the NADylation of RNAIII is likely dependent on the bacterial  
417 redox state and might be a new mechanism to fine-tune *agr* activity.

#### 418 **5.4 Outlook.**

419 In this study, we have discovered another prokaryotic organism that possesses NAD-capped  
420 RNAs. However, it constitutes the first evidence of this phenomenon in pathogenic bacteria to  
421 date. More importantly, we have found that a crucial regulatory and protein-coding RNA (RNAIII)  
422 is strongly NAD-modified and that alterations on its NAD-modification state lead to significant  
423 effects that modulate *S. aureus*'s cytotoxicity that could be related to an alternative secondary  
424 structure of RNAIII. However, and despite these exciting findings, the role of 5'-NAD-RNAIII  
425 remains unclear. Further studies will be conducted to unravel how exactly the NAD cap changes  
426 RNAIII's secondary structure and how this change contributes to the overall secondary structure  
427 ensemble of RNAIII. Furthermore, *in vivo* studies applying our mutant *S. aureus* strains to animal  
428 infection models are planned to study the pathogenicity of this bacterium.

### 429 **6 Materials and Methods**

#### 430 **6.1 Bacterial strains.**

431 *S. aureus* ATCC 25923 was the selected strain to detect the presence of NAD covalently linked to  
432 RNA by UPLC-MS analysis, NAD captureSeq, and pull-down of specific RNAs. *S. aureus* HG001 was  
433 used as wild-type and for the mutational studies. The pCG-246-based (Helle et al., 2011) shuttle  
434 plasmids pCG-P3, pCG-P2 and pCG-P3(-1G) were first grown in *E. coli* K-12 strain, then  
435 transformed into the restriction-deficient *S. aureus* RN4220, and finally electroporated into *S.*  
436 *aureus* HG001  $\Delta$ RNAIII as described before (Charpentier et al., 2004). For the cytotoxicity assay,  
437 the constructs were introduced into *S. aureus*  $\Delta$ RNAIII  $\Delta$ psma $\beta$ . Genomic DNA from *S. aureus*  
438 ATCC 25923 was used to amplify the P3 promoter, P2 promoter, and RNAIII sequences (Q5 Hot  
439 Start High-Fidelity DNA Polymerase, NEB). The bacterial strains used in this study are summarised  
440 in Table S9.

#### 441 **6.2 Generation of constructs.**

442 The RNAIII sequence with the native P3 promoter sequence upstream was amplified from  
443 Genomic DNA from *S. aureus* ATCC 25923. The PCR amplification was carried out with the primers  
444 Fwd-P3-RNAIII/Rv-P3-RNAIII; as a consequence, the restriction sites *Bam*HI and *Eco*RI were  
445 introduced in the amplicon. The P2 promoter sequence was fused to RNAIII by the following  
446 procedure: a PCR with the primers Fwd-P2/Rv-P2hyb was performed in order to generate a P2-  
447 amplicon with a 20 bp overhang on its 3'-end which was complementary to RNAIII's first 20 nt.  
448 The PCR with primers Fwd-RNAIII/Rv-RNAIII originated a second amplicon containing the whole  
449 RNAIII sequence. Both amplicons were used as primers and subjected to PCR in order to generate  
450 the P2-RNAIII product, which contained *Bam*HI and *Eco*RI restriction sites. Both PCR products

451 were treated with *Bam*HI and *Eco*RI and cloned into the pCG-246 shuttle vector (Helle et al., 2011)  
452 yielding the constructs pCG-671 and pCG-672. The RNAIII terminator sequence was introduced  
453 afterwards in both of the constructs by site-directed mutagenesis generating pCG-P3 and pCG-  
454 P2 plasmids. Besides, a mutation at the -1 position (-1T to -1G) respect to the TSS of the P3  
455 promoter was inserted by site-directed mutagenesis, yielding plasmid pCG-P3(-1G). All primers  
456 used are summarised in Table S3.

### 457 **6.3 NAD captureSeq and RNA-seq Next Generation Sequencing (NGS).**

458 In order to identify those NAD-RNAs from *S. aureus*, we have made use of NAD captureSeq as  
459 described previously (Winz et al., 2017) and applied to 100 µg total RNA from *S. aureus* ATCC  
460 25923 per sample isolated at the late-exponential phase ( $OD_{600} = 1.5$ ). A NAD captureSeq variant  
461 was also used in order to compare the enrichment of specific RNAs between *S. aureus* strains  
462 (pCG-P2, pCG-P3, and pCG-P3(-1G)). For that, 15 fmol of variable length (61, 104, 205, 302, 400  
463 nt) NAD-RNAs were spiked into each sample, acting as internal standards (IS). The PCR products  
464 were purified by polyacrylamide (PA) gel electrophoresis (PAGE), and the range between 150 and  
465 300 bp selected (Figure S1A). This size selection helped to remove the primer dimers as well.  
466 Afterwards, the quality of the samples was analysed by Bioanalyzer measurements (Bioanalyzer  
467 2100, Agilent Technologies, Santa Clara, California) using the Agilent DNA 1000 Kit (Agilent). The  
468 libraries were multiplexed and submitted to NGS on a NextSeq500 sequencer (Illumina, San  
469 Diego, California) with the following parameters: single-end reads, 75-bp read length, read depth  
470 400 million. Besides, 20% of PhiX control DNA was spiked into the samples to provide sufficient  
471 read complexity. The NGS data analysis was done using an in-house pipeline. Briefly, after  
472 obtaining the raw reads, the leading guanines were trimmed, and the 3' adapter was removed  
473 by clipping. Once processed, the reads were mapped to the reference genome *Staphylococcus*  
474 *aureus subsp. aureus* NCTC 8325 (European Nucleotide Archive, Assembly: GCA\_000013425.1)  
475 and to the IS RNA sequences (in the case of the quantitative NAD captureSeq, Table S4). The  
476 software used for mapping was Burrows-Wheeler Aligner (BWA-MEM, version: 0.7.13) (H. Li,  
477 2013). To identify the gene hits, HTSeq (version: 0.6.0) (Anders, Pyl, & Huber, 2015) was used.  
478 Also, DESeq (Anders & Huber, 2010) was used for statistical analysis. Finally, the obtained hits  
479 were checked and visualised with the Integrated Genome Browser (Nicol et al., 2009). RNA-seq  
480 analysis was conducted with total RNA of *S. aureus* pCG-P2, pCG-P3, and pCG-P3(-1G) strains  
481 (biological triplicates, 5 µg total RNA each sample) isolated at the late-exponential phase ( $OD_{600}$   
482 = 2.5). For removal of ribosomal RNA from samples, the Ribo-Zero rRNA Removal Kit (Gram-  
483 Positive Bacteria, Illumina) was used. The libraries were prepared with NEBNext Ultra II  
484 Directional RNA LibraryPrep Kit for Illumina (New England Biolabs (NEB), Ipswich,  
485 Massachussets) together with the NEBNext Multiplex Oligos for Illumina (NEB). The removal of  
486 primer excess and primer dimers was done by the Agencourt AMPure XP RNA Clean beads  
487 (Beckman Coulter, Brea, California). The amount of sample was assessed by Qubit HS DNA assay  
488 (Thermo Fisher Scientific, Waltham, Massachussets), whereas the sample quality was checked  
489 with Agilent Tape Station D1000 for DNA. Samples were equimolarly pooled before 50 SE  
490 sequencing on the Illumina HiSeq platform. NGS data analysis was performed with an in-house  
491 pipeline, and the reads were mapped to the reference genome *Staphylococcus aureus subsp.*  
492 *aureus* NCTC 8325 (European Nucleotide Archive, Assembly: GCA\_000013425.1).

#### 493 **6.4 Total RNA isolation.**

494 *S. aureus* strains were grown at 37 °C with shaking at 200 rpm in LB broth (Lennox), and cells  
495 were harvested at OD<sub>600</sub> = 2.5 (experiments conducted with *S. aureus* HG001 plasmid-  
496 transformed strains) and OD<sub>600</sub> = 1.5 (experiments conducted with *S. aureus* ATCC 25923). The  
497 RNA was extracted using TRIzol reagent (Thermo Fisher Scientific). Briefly, the pelleted cells were  
498 resuspended in TE buffer (30 mM Tris-HCl, 1 mM EDTA, pH = 8.0) supplemented with lysozyme  
499 20 mg/mL (Sigma-Aldrich, Saint Louis, Missouri) and 80 µg/mL lysostaphin (Sigma-Aldrich) and  
500 incubated 30 min at 37 °C. The cells were incubated for 30 min at -80 °C before the addition of  
501 the TRIzol reagent. Afterwards, the protocol proceeded according to the manufacturer's  
502 instructions. Samples were treated with DNase I (1.5 U/mg total RNA, Roche, Basel, Switzerland)  
503 at 37 °C for 1 hour to remove the genomic DNA, then they were P/C/I-chloroform-extracted and  
504 precipitated. The RNA was washed twice with 80% ethanol and dissolved in Millipore water. The  
505 quality of the RNA was assessed by agarose gel electrophoresis (Figure S1H). The concentration  
506 and purity of the total RNA were measured by Nanodrop (Thermo Fisher Scientific), paying  
507 attention to OD<sub>260</sub>/OD<sub>280</sub> and OD<sub>260</sub>/OD<sub>230</sub> ratios.

#### 508 **6.5 Quantitative PCR.**

509 To confirm the enrichment of the obtained hits at the cDNA level and thereby rule out the  
510 possible PCR bias, qPCR measurements were carried out as described before (Cahová et al.,  
511 2015). 20 µL reactions were performed in triplicate using 3 µL cDNA (1:50 diluted) as a template.  
512 When confirming the cDNA enrichment of the hits, APDRC-treated sample cDNA with cDNA of  
513 the minus ADPRC control were compared by the  $2^{-\Delta\Delta C_T}$ -method (Livak & Schmittgen, 2001). The  
514 5SrRNA gene was used as internal control and Millipore water as a negative control. Another  
515 qPCR assay was performed to check the *hld*/RNAIII levels of the different *S. aureus* strains (pCG-  
516 P2, pCG-P3, and pCG-P3(-1G)). 5 µg of total RNA (harvested at late-exponential phase, biological  
517 triplicates) from each strain was reverse transcribed with Superscript IV reverse transcriptase  
518 (Thermo Fisher Scientific) following the manufacturer's instructions. 3 µL cDNA (1:100 diluted)  
519 per 20 µL reaction were used as the template. The *gyrB* gene was used as internal standard and  
520 Millipore water as a negative control. Standard curves were determined for each gene, using  
521 purified chromosomal DNA at concentrations of 0.005 to 50 ng/ml. All qPCR experiments were  
522 performed in a Light Cycler 480 instrument (Roche) using the Brilliant III Ultra-Fast SYBRGreen  
523 qPCR Mastermix (Agilent Technologies). The data were analyzed with the Light Cycler 480  
524 Software (Agilent Technologies). The primers used for qPCR analysis are listed in Table S3.

#### 525 **6.6 Detection of Hld by HPLC/ESI-MS.**

526 The detection of Hld levels from different *S. aureus* strains was performed by high-performance  
527 liquid chromatography/electrospray ionisation mass spectrometry (HPLC/ESI-MS) of overnight  
528 culture filtrates as described earlier (Queck et al., 2008) with minor changes. The column (Zorbax  
529 SBC8, 2.1 x 50 mm, 3.5 µ, Agilent Technologies) was run at 0.3 ml/min with a gradient of 0.1%  
530 trifluoroacetic acid in water to 0.1% trifluoroacetic acid in acetonitrile. HPLC-MS experiments  
531 were performed on a Bruker microTOFQ-II ESI mass spectrometer (Bruker, Billerica,  
532 Massachussets) connected to an Agilent 1200 Series HPLC system equipped with a multi-

533 wavelength detector (Agilent Technologies). ESI was used with a capillary voltage of 4,500 V, and  
534 the collision voltage was set to 10 eV. The drying gas temperature was 200 °C, the drying gas flow  
535 rate was 6 Lmin<sup>-1</sup> and the detector was operated in positive ion mode. Mass spectra were  
536 recorded on a range from 250 m/z to 3,000 m/z. The two m/z peaks in the mass spectrum for Hld  
537 (formylated and deformylated version, Figure S1F) were used to calculate PSM concentration by  
538 integration using ACD/Spectrus software (Advanced Chemistry Development (ACD), Toronto,  
539 Canada).

## 540 **6.7 Western blotting of Hla.**

541 One milliliter of cell culture filtrates from each strain (harvested at OD<sub>600</sub> = 2.5) was filtrated and  
542 concentrated (final volume 20 µL) through ultracentrifugal filters (30 kDa MWCO, Amicon, Merck,  
543 Darmstadt, Germany) and analysed by 10% SDS-PAGE. After the run, SDS-PA gels were blotted  
544 onto Amersham Hybond P 0.2 µm PVDF membranes (GE Healthcare, Chicago, Illinois) using an  
545 EasyPhor Semi-Dry-Blotter (Biozym Scientific, Hessisch Oldendorf, Germany). Membranes were  
546 blocked in TBST (Tris-buffered saline with 0.1% Tween 20) supplemented with 5% milk powder  
547 (Carl Roth, Karlsruhe, Germany). Afterwards, membranes were incubated with anti-  
548 staphylococcal alpha-toxin rabbit antibody (1:5000, Sigma-Aldrich) in washing buffer (TBST with  
549 1% milk powder). After washing, Alexa Fluor Plus 488-conjugated goat anti-rabbit IgG (Thermo  
550 Fisher Scientific) in washing buffer (1:10000) was applied over the membranes. Membranes were  
551 washed with 50 mM Tris-HCl, pH 7.25, and subsequently scanned using a Typhoon FLA 9500  
552 imager (GE Healthcare). Quantification was done with ImageQuant TL software (GE Healthcare).

## 553 **6.8 Detection of NAD covalently bound to RNA by UPLC/MS.**

554 Samples (total RNA and pull-down RNA) were prepared as described before (Frindert et al., 2018).  
555 Briefly, RNA was extensively washed with decreasing urea concentrations in ultracentrifugal  
556 filters (10 kDa MWCO, Amicon, Merck). RNA was recovered and subjected to NudC and alkaline  
557 phosphatase (Sigma-Aldrich) treatment (1 h at 37 °C, 2 h for pull-down RNA) in the presence of  
558 the MS internal standard (d4-ribose nicotinamide, Toronto Research Chemicals, Ontario,  
559 Canada). Afterwards, the reaction mixtures were filtered through 10 kDa ultracentrifugal filters  
560 (Merck) and dried under reduced pressure. Then, samples were analysed by UPLC-MS following  
561 the previously described protocol (Frindert et al., 2018). A calibration curve was recorded for r-  
562 NA for each analytical batch. M/z peaks of the mass spectra from the analyte and internal  
563 standard were integrated with TargetLynx software (Waters corporation, Milford,  
564 Massachusetts). The amount of injected r-NA was calculated by integration of the corresponding  
565 m/z peak using the TargetLynx software and the calibration curve.

## 566 **6.9 Gel electrophoresis and Northern Blot analysis.**

567 RNA was separated by denaturing PAGE. For NAD captureSeq NGS library generation (Qualitative  
568 and Quantitative), the cDNA amplification products were purified by native PAGE. APBgels (Nübel  
569 et al., 2017) were used to separate and purify NAD-RNA and ppp/p-RNA. Northern blot analysis  
570 was performed as described before (Cahová et al., 2015). RNA was separated either by PAGE or  
571 PAGE-APBgels (200 V, 90 min), blotted onto a Whatman Nytran SuPerCharge nylon blotting

572 membrane (Merck) for 3 h (4 h for APBgels at 4 °C to avoid buffer evaporation) at 250 mA using  
573 an EasyPhor Semi-Dry-Blotter (Biozym Scientific), and UV-crosslinked. Membranes were pre-  
574 hybridized in Roti-Hybri-QuickBuffer (Carl Roth) for 2 h at 48 °C. Afterward, 5 µL RNA radiolabeled  
575 probe (Table S3) was added and incubated overnight at 48 °C in a hybridization oven with  
576 rotation. The templates for the probes were prepared by PCR using Taq DNA polymerase  
577 (prepared laboratory stock). Probes were prepared by *in vitro* transcription (IVT) in the presence  
578 of 35 µCi  $\alpha$ -<sup>32</sup>P-ATP and 35 µCi  $\alpha$ -<sup>32</sup>P-CTP (3,000 Ci/mmol, each, Hartmann Analytic,  
579 Braunschweig, Germany). The IVT reactions were treated with DNase I (Roche), P/C/I-  
580 chloroform-extracted, ethanol-precipitated and dissolved in 30 µL Millipore water. The blot was  
581 washed for 30 min with wash solution 1 (2x SSC, 0.1% SDS), 30 min with wash solution 2 (1x SSC,  
582 0.1% SDS) for 30 min with wash solution 3 (0.25x SSC, 0.1% SDS). Radioactive RNA was visualized  
583 using storage phosphor screens (GE Healthcare) and a Typhoon FLA 9500 imager (GE Healthcare).

#### 584 **6.10 Preparation of NAD-RNAIII and ppp-RNAIII markers and IS NAD-RNAs.**

585 The RNAIII markers used in the Northern blot analysis were prepared by IVT. The IVTs were  
586 performed as described earlier (Huang, 2003). Each 100 µl IVT reaction contained: 1.5-2 µg DNA  
587 template and 4 mM of each NTP (6 mM NAD for NAD-RNAs; ATP concentration was reduced to  
588 2 mM, or without NAD for ppp-RNAs). The reactions were performed in transcription buffer (40  
589 mM Tris-HCl pH = 8.1, 1 mM spermidine, 22 mM MgCl<sub>2</sub>, 0.01% Triton X-100, 10 mM dithiothreitol  
590 (DTT), 5% DMSO). Reactions were stopped upon addition of denaturing gel loading buffer (10%  
591 TBE in formamide containing 0.05% bromophenol blue, 0.5% xylene cyanol blue) and purified by  
592 PAGE with standard running conditions (1x TBE buffer, 600 V). RNAs were excised after the run,  
593 eluted overnight in 0.3 M sodium acetate (pH = 5.5) at 19 °C, isopropanol-precipitated and  
594 dissolved in Millipore water. DNA templates for the RNAIII markers were prepared by PCR  
595 amplification of genomic DNA from *S. aureus* ATCC 25923 using Q5 Hot Start High-Fidelity DNA  
596 Polymerase (NEB) and the primers listed on Table S3. The PCR products were purified with the  
597 QIAquick PCR purification kit (Qiagen, Hilden, Germany) before the IVT reactions.

598 The 5 different IS NAD-RNAs used for NAD captureSeq were also prepared by IVT (Huang, 2003).  
599 As a template, regions of *E. coli*'s K12 genome with no homology within *S. aureus* genome were  
600 PCR amplified (Q5 Hot Start High-Fidelity DNA Polymerase (NEB)) with the primers summarised  
601 in Table S3. The PCR products were purified with QIAquick PCR purification kit (Qiagen) before  
602 IVT. IVT reactions were PAGE purified, as described above. Afterwards, the RNAs were  
603 additionally purified on APBgels (5% PA, 0.4% APB) (Nübel et al., 2017), loaded with APBgels  
604 loading buffer (8 M urea, 10 mM Tris-HCl pH = 8.0, 50 mM EDTA, xylene cyanol and bromophenol)  
605 and run in 1x TAE (550 V). The sequences of each IS NAD-RNA are summarised in Table S4.

#### 606 **6.11 Preparation of radiolabeled pure NAD-RNAIII and NudC cleavage assay.**

607 The radiolabeled (body labelled) pure NAD-RNAIII was prepared by IVT essentially as described  
608 before (Huang, 2003) but with the presence of 100 µCi  $\alpha$ -<sup>32</sup>P-UTP (3,000 Ci/mmol, Hartmann  
609 Analytic) per 100 µL reaction. The IVT reaction was first PAGE-purified and afterwards purified  
610 on APB gels as described above to obtain 100% NAD-modified RNAIII, which was subjected to  
611 NudC cleavage. The NudC cleavage assay was carried out as described before (Cahová et al.,  
612 2015) but with a ratio of 2 NudC:1 RNAIII. 10 µL reactions per triplicate in 1x degradation buffer

613 (25 mM Tris-HCl pH = 7.5, 50 mM NaCl, 50 mM KCl, 10 mM MgCl<sub>2</sub>, 10 mM DTT) were incubated  
614 for 5, 10, 20, 30, 60 and 120 min at 37 °C. Reactions were stopped by addition of APBgel loading  
615 buffer and analysed on APBgels (6% PA, 0.7% APB). The stability of NAD-RNAIII in 1x degradation  
616 buffer was assessed by incubating it for 2 hours at 37 °C in the absence and the presence of the  
617 enzyme (Figure 1, Figure 3A).

618 Additional reactions per triplicate were performed to test the influence of RNAIII's secondary  
619 structure on NudC cleavage capacity. After a 60 incubation at 37 °C in the presence of NudC,  
620 samples were heated up to 75 °C for 2 min and cooled down to 25 °C (NAD-RNAIII folding after  
621 digestion). Afterward, fresh NudC was added, and samples underwent a second round of  
622 incubation (60 min at 37 °C, Figure 1, Figure 3A).

623 Radioactive RNA was visualised using storage phosphor screens (GE Healthcare) and a Typhoon  
624 FLA 9500 imager (GE Healthcare).

### 625 **6.12 Pull-down of RNAIII and 5SrRNA.**

626 RNAs were specifically isolated out of 300 µg total RNA as described previously (Cahová et al.,  
627 2015; Frindert et al., 2018). Briefly, 150 µL Streptavidin Sepharose High Performance beads (GE  
628 Healthcare) were loaded onto Mobicol Classic columns (MoBiTec, Göttingen, Germany), washed  
629 with 1x PBS and supplemented with biotinylated DNA probes (Biomers, Ulm, Germany, Table S3)  
630 dissolved in 1x PBS (75 µL, 25 mM, with incubation for 10 min at 25 °C with shaking at 1000 rpm).  
631 After washing and equilibration of the beads (with 1x PBS and pull-down buffer (10 mM Tris-HCl  
632 pH 7.8, 0.9 M tetramethylammoniumchloride, 0.1 M EDTA pH 8.0), total RNA dissolved in pull-  
633 down buffer was added. RNA was then incubated for 10 min at 65 °C and then for 25 min at room  
634 temperature with rotation (Tube Rotator, VWR, Radnor, Pennsylvania). Beads were washed with  
635 Millipore water, and RNA was eluted upon addition of 2mM EDTA (pre-heated to 75 °C). The  
636 eluted RNA was precipitated with 0.5 M ammonium acetate and isopropanol in a reaction tube  
637 and dissolved in Millipore water. Northern blot analysis with the pull-down eluates and probes  
638 vs RNAIII and 5SrRNA was performed (Figure S1I). Afterwards, RNA was further purified by 8%  
639 PAGE and the bands corresponding to RNAIII and 5SrRNA excised (Figure S1J). After RNA  
640 precipitation and washing, RNA concentration was measured with Qubit RNA BR Assay Kit  
641 (Thermo Fisher Scientific). The purified RNA was used for: Northern bot analysis (Figure S1K) and  
642 NudC treatment with subsequent UPLC-MS analysis as described above. For DNAzyme treatment,  
643 the precipitated RNA was used without further PAGE purification (Figure 1E).

### 644 **6.13 Generation of RNA-cleaving DNA enzymes.**

645 Four different RNA-cleaving DNAzymes were generated following the instructions by Joyce  
646 (Joyce, 2001) to generate a shorter RNAIII. DNAzymes were tested on RNAIII *in vitro*, and the  
647 most efficient one was selected for further experiments (DNAzyme II, Figure S1L). The cleavage  
648 of RNAIII by DNAzyme II (37 nt, Table S3) generated a 125 nt product containing RNAIII's 5'-  
649 terminus. For the *in vitro* cleavage assays, 10 µL reactions were set up in 1x DNAzyme buffer (10  
650 mM Tris-HCl pH = 8.0, 5 mM NaCl) supplemented with 1 µM NAD/ppp-RNAIII, 0.2 mM DTT, 25  
651 mM MgCl<sub>2</sub>, and 1 µM DNAzyme II. First, RNAIII was folded in the presence of 0.2 mM DTT by  
652 incubation for 2 min at 75 °C, followed by a cool down to 25 °C. Afterwards, the remaining  
653 reagents were added (MgCl<sub>2</sub>, DNAzyme II) and reactions were incubated 1 h at 37 °C. Reactions



654 were stopped by addition of denaturing gel loading buffer and analysed by classical PAGE and  
655 APBgels followed by Northern blot as described above (Figure S1L). The same procedure was  
656 followed with RNAIII obtained after pull-down (biological triplicates, 2  $\mu$ M DNAzyme II) but  
657 including an additional NudC treatment (1.5  $\mu$ M NudC, 1h 37 °C) right after RNA cleavage as a  
658 negative control (to deplete NAD-RNAIII). NAD-RNAIII and ppp-RNAIII treated with DNAzyme II  
659 and I were used as reference markers in the Northern Blot assay of RNAIII pull down samples.

#### 660 **6.14 Analysis of 5'-ends by circular RT-PCR and Sanger sequencing.**

661 To analyse RNAIII's TSS on the different *S. aureus* mutant strains (pCG-P3, pCG-P2, pCG-P3(-1G)),  
662 circular RT-PCR was carried out as described before (Slomovic & Schuster, 2013) with small  
663 differences. In essence, 10  $\mu$ g of total RNA of each strain was treated with RNA 5'-  
664 Polyphosphatase (Epicentre, Madison, Wisconsin). The dephosphorylated RNAs were self-ligated  
665 by T4 RNA ligase (Thermo Fisher Scientific) treatment, and the predicted 3'-end-5'-end ligated  
666 region of RNAIII was amplified by nested PCR with the primers listed in Table S3. The purified  
667 amplicons were then phosphorylated by T4-Polynucleotide Kinase (Thermo Fisher Scientific)  
668 treatment before cloning them into the plasmid pDisplay-AP-CFP-TM (Addgene plasmid #20861  
669 (pDisplay-AP-CFP-TM was a gift from Alice Ting (Howarth, Takao, Hayashi, & Ting, 2005)),  
670 previously digested with EcoRV (NEB) and dephosphorylated by alkaline phosphatase (Thermo  
671 Fisher Scientific)). The blunt-end ligation was carried out by T4-DNA ligase (Thermo Fisher  
672 Scientific). The ligation mixture was transformed into *E. coli* DH5 $\alpha$  competent cells. The  
673 transformed cells were streaked on Petri dishes containing LB-agar supplemented with ampicillin  
674 (100  $\mu$ g/mL, Carl Roth) and incubated overnight at 37 °C. Single colonies were picked, the  
675 plasmids isolated and subjected to high throughput Sanger sequencing (Microsynth SeqLab,  
676 Göttingen, Germany). All the enzymatic treatments were performed according to the  
677 manufacturer's instructions.

#### 678 **6.15 Cytotoxicity assay.**

679 Overnight cultures were sub-cultured to OD<sub>600</sub> = 0.05 in LB-broth (Lennox) and then grown for ~  
680 22 h. Bacterial supernatants were harvested and filtered through a 0.45  $\mu$ m filter (Merck) and  
681 analysed for its cytotoxic potential. The cytotoxicity assay was performed essentially as described  
682 (Munzenmayer et al., 2016) with the exception that 1x10<sup>5</sup> THP1 cells were seeded in 96-well cell  
683 8culture plates in a final volume of 100  $\mu$ L. Differentiated THP1 macrophages were treated with  
684 200  $\mu$ L of each bacterial supernatant. THP1 cells with culture medium were used as negative  
685 control and THP1 cells treated with Phosphate Buffered Saline (PBS) containing 1% TritonX-100  
686 were used as a positive control. The cytotoxic potential of the samples was determined from  
687 THP1-cell supernatants after 3 hours by using the Cytotoxicity Detection Kit (Roche) according to  
688 the manufacturer's instructions.

#### 689 **6.16 Structural analysis of RNAIII variants by SHAPE**

690 1M7 was synthesized as described (Mortimer & Weeks, 2007). A shorter version of RNAIII  
691 comprising nucleotides 1 to 113 (RNAIII leader) and full-length RNAIII with different 5'-ends (5'-  
692 NAD cap or triphosphate) were prepared by *in vitro* transcription as described above. In the case

693 of full-length RNAIII, a mixture containing ~ 1:1 NAD-RNAIII and ppp-RNAIII was prepared  
694 whereas the obtained NAD-RNAIII leader was 100% NAD-modified. The IVT template was  
695 generated by PCR with the primers RNAIII-leader-FW and RNAIII-leader-RV. Genomic DNA from  
696 *S. aureus* ATCC 25923 was used for the PCR. The NAD-supplemented IVT reaction was double-  
697 purified, first by denaturing PAGE and afterwards by APB gels, yielding NAD-RNAIII leader and  
698 ppp-RNAIII leader (Figure S1M).

699 SHAPE was performed as described with minor modifications (Wilkinson et al., 2006). Briefly, 8  
700 pmol of RNA dissolved in 47.8  $\mu$ L Millipore water were incubated for 2 min at 75  $^{\circ}$ C and then  
701 cooled down to 60  $^{\circ}$ C with a ramp of 0.1  $^{\circ}$ C/s. Afterwards, 24.2  $\mu$ L of Dulbecco's Phosphate  
702 Buffered Saline (DPBS, Sigma-Aldrich) supplemented with 3 mM MgCl<sub>2</sub> were added to the  
703 samples, and they were incubated 2 min at 60  $^{\circ}$ C. Samples were then cooled down to 30  $^{\circ}$ C (0.1  
704  $^{\circ}$ C/s) and kept 2 min at this temperature. During this step, each sample was equally divided into  
705 two vials (sample vial and control vial). The vials were heated up to 37  $^{\circ}$ C, and then 4  $\mu$ L of 100  
706 mM 1M7 (10 mM final concentration) was added to sample vial. 1M7 was dissolved in dry DMSO  
707 (Sigma-Aldrich), so the reaction control was supplemented with the same volume of dry DMSO  
708 as in the sample (4  $\mu$ L). The reaction mixtures were incubated for 20 min at 37  $^{\circ}$ C. Finally,  
709 reactions were stopped by adding 1 reaction volume of Millipore water, and the RNA was  
710 precipitated by ethanol in the presence of 0.3 M sodium acetate. The precipitated RNA was  
711 washed twice with 80% ethanol and dissolved in Millipore water to a concentration of 0.5  
712 pmol/mL.

713 For primer extension, 100 pmol of SHAPE-RT1 primer (Table S3) were radioactively labeled on its  
714 5'-end with 3  $\mu$ L of  $\gamma$ -<sup>32</sup>P-ATP (3,000 Ci/mmol, Hartmann Analytic) per 20  $\mu$ L reaction by using T4  
715 polynucleotide kinase (Thermo Fisher Scientific), and further purified with the QIAquick  
716 Nucleotide Removal Kit (Qiagen). Both steps were performed following the manufacturer's  
717 instructions.

718 The primer extension assay was applied to the RNA samples by using Superscript IV reverse  
719 transcriptase (Thermo Fisher Scientific). The reaction volume was set to 10  $\mu$ L. 1 pmol of treated  
720 RNA per reaction was used as a template for the reaction together with 5  $\mu$ L of 5'-end  
721 radiolabeled DNA primer 1  $\mu$ M. A sequencing ladder was generated by reverse transcription of 1  
722 pmol non-treated *in vitro*-transcribed ppp-RNAIII leader supplemented with 0.5 mM  
723 deoxynucleotide triphosphate mix each (Sigma-Aldrich), and 1 mM of the corresponding  
724 dideoxynucleotide triphosphate (Jena Bioscience, Jena, Germany). Reactions were performed  
725 according to the manufacturer's instructions. The removal of residual RNA was done by addition  
726 of 2  $\mu$ L 1 M NaOH to the samples followed by a 5 min incubation at 90  $^{\circ}$ C. Samples were then  
727 neutralised by the addition of 2  $\mu$ L 1 M HCL and stored at -20  $^{\circ}$ C in denaturing gel loading buffer  
728 before being analysed by PAGE.

729 Samples processed in triplicate were analysed by 15% PA sequencing gels with standard running  
730 conditions (TBE buffer, 2000 V, 4h 30 min run time, Figure S1L). Radioactive cDNA was visualised  
731 with storage phosphor screens (GE Healthcare) and a Typhoon FLA 9500 imager (GE Healthcare).  
732 Quantification of PA sequencing gels was done with the software SAFA (Laederach et al., 2008).  
733 The intensities of the bands were normalised, and the control lanes (DMSO treated) were  
734 subtracted from the sample lanes (1M7 treated) to obtain the SHAPE values for each nucleotide.  
735 The SHAPE values for each nucleotide were afterwards used in the RNAstructure software (Reuter  
736 & Mathews, 2010) to create a structure prediction for the RNA sequence.

## 737 **6.17 Statistical analysis**

738 Except for NGS data analysis, where DESeq statistics was used (Anders & Huber, 2010), all  
739 statistics were analysed using the software Prism 6 version 6.01 (GraphPad, San Diego,  
740 California). Error bars depict standard deviations in all experiments. For specific data sets,  
741 identification of outliers was performed by Grubbs' method (Alpha = 0.2). When comparing two  
742 groups, the parametric unpaired two-tailed Student's t-test was selected. For the analysis of  
743 experiments involving three or more groups, the parametric one-way ANOVA test was done. The  
744 applied *Post hoc* analysis was Tukey's multiple comparisons-test. Differences were considered  
745 significant when  $P < 0.05$ .

## 746 **7 Author contributions**

747  
748 H.M. and A.J. designed the study. H.M., N.K., Y.Z., and G.N. performed the experiments. H.M.,  
749 Y.Z., G.N., S.E.G., C.W., and A.J. analyzed the data. H.M. and A.J. wrote the initial draft of the  
750 manuscript, and H.M., A.J., C.W and S.E.G. edited the manuscript.

## 751 **8 Acknowledgements**

752  
753 This work was financed by Baden-Württemberg Stiftung (grant BWST\_NCRNA\_045). We thank all  
754 the members of the Jäschke Group for their support and input during the discussions, A. Dalpke  
755 and K. Kubatzky for the BSL2 laboratory workspace, the CellNetworks Deep Sequencing Core  
756 facility, in particular D. Ibberson, for cDNA library preparation and sequencing, M. Brunner for  
757 the access to the LightCycler and S. Suhm for helping with the synthesis of 1M7 and APB. H.G.M.F.  
758 thanks the Deutscher Akademischer Austausch Dienst (DAAD) for the awarded scholarship.

## 759 **9 Competing interests**

760  
761 The authors declare no competing interests.

## 762 **10 Figure legends**

763  
764 **Figure 1:**  
765 **A:** Schematic representation of the cell-population-sensor Agr locus in *S. aureus*. AgrD is a  
766 precursor peptide that is converted into an autoinducing peptide (AIP) upon proteolysis by AgrB  
767 (transmembrane protein) and secreted to the exterior. The AIP then binds to the AgrC receptor,  
768 triggering autophosphorylation of its intracellular histidine kinase domain. AgrA is activated by  
769 the transfer of the phosphate group of AgrC and enhances transcription of P2 and P3 promoters,  
770 leading to RNAII and RNAPIII production. RNAII encodes all the Agr proteins (AgrB/D/C/A) whereas  
771 RNAPIII is a regulatory RNA also containing an ORF encoding for delta-toxin (Hld) (See text for more  
772 details).  
773 **B:** Scatter plot of NGS data after NAD captureSeq. Y-axis represents the enrichment of RNAs (Log2  
774 Fold change) in the fully treated samples against minus ADPRC (control). The X-axis shows the  
775 average of normalized counts. The dots confined in the upper right region of the plot represent  
776 the RNAs significantly enriched (NAD-capped RNAs). The light green dots depict the hits

777 clustering at the 5'-UTR and with +1A. A light green star represents the *hld*/RNAIII gene, which is  
778 the most enriched by far, whereas RNAII (depicted by a red star) is located in the non-enriched  
779 area of the graph.

780 **C:** Distribution of normalized reads on the *hld*/RNAIII gene (grey bar) visualized with the  
781 Integrated Genome Browser (Nicol et al., 2009). The sample reads (shown in blue) are the  
782 normalized reads of the ADPRC-treated sample group whereas the red-labeled control reads are  
783 the ADPRC-negative. The orientation of the gene is indicated in the black bar above and  
784 represents the coding strand (+). RPM: Reads per million mapped reads.

785 **D:** Bar chart representing the enrichment at the cDNA level of three targeted regions of the  
786 *hld*/RNAIII gene (5'-UTR, middle region, and 3'-region). The Y-axis represents the Cp fold change  
787 (sample vs. negative control group) obtained by qPCR.

788 **E:** Schematic view of workflow followed for detection of NAD-RNAs in total RNA samples and  
789 pulled-down RNAs.

790 **F:** Extracted ion chromatogram representing the pull-down LC-MS outcome. The Y-axis  
791 represents the NAD (r-NA) intensity of RNAIII (green, from 40 ng RNA) and 5SrRNA (blue, negative  
792 control, from 960 ng RNA). The X-axis indicates the retention time in minutes. The table beneath  
793 shows the concentration of r-NA (NAD) per ng RNA and also the NAD modification percentage  
794 for each RNA.

795  
796

797 **Figure 2:**

798 **A:** Promoter sequences of the different pCG-246-derived constructs used in the study (pCG-P3,  
799 pCG-P3(-1G), and pCG-P2). Highlighted are the -35 (-35, purple for P3 and light gray for P2), -10  
800 (-10, brown for P3 and orange for P2) and -1 (-1, light blue for native P3, pink for mutated P3 and  
801 black for native P2) regions. The first four nucleotides of RNAIII are highlighted in green.

802 **B:** The figure shows the workflow (steps 1 to 6) followed for the pull-down of specific RNA targets  
803 and the subsequent RNA cleavage by a DNAzyme (see text for more information).

804 **C:** Analysis of pulled-down RNAIII by Northern blot on APBgels after DNAzyme treatment of the  
805 different *S. aureus* strains (pCG-P3, pCG-P3(-1G), and pCG-P2, each of them by triplicate). The  
806 arrows indicate the bands belonging to NAD-RNAIII and ppp-RNAIII 5'-termini. As a marker, 10 ng  
807 of *in vitro*-transcribed (IVT) ppp-RNAIII treated with DNAzyme were loaded in the first lane from  
808 the left. Control samples underwent a NudC treatment before analysis on APBgels. The marker  
809 used was mixed NAD/ppp-RNAIII instead of ppp-RNAIII. The bar chart beneath depicts the  
810 quantification of NAD-modification ratio of RNAIII of *S. aureus* pCG-P3 (black) and pCG-P3(-1G)  
811 (blue), based on the Northern blot without NudC treatment. Statistical significance determined  
812 by *t*-test,  $n = 5$ .

813 **D:** The chart represents the enrichment (capture efficiency) of each of the IS NAD-RNAs in the  
814 three NAD captureSeq experiments conducted: *S. aureus* pCG-P3 (black dot and line), pCG-P3(-  
815 1G) (blue square and line) and pCG-P2 (red triangle and line).

816 **E:** Scatter plot of NGS data after NAD captureSeq. Y-axis represents the enrichment of *hld*/RNAIII  
817 gene (log2fold change) in the fully treated samples against minus ADPRC (control). The X-axis  
818 shows the average of normalised counts. Each strain is represented with markers: a black dot for  
819 pCG-P3, blue triangle for pCG-P3(-1G), and red square for pCG-P2. The bar chart on the right side  
820 shows the RNAIII enrichment in terms of fold change (sample vs negative control) of pCG-P3  
821 (black bar) and pCG-P3(-1G) (blue bar) *S. aureus* strains. Statistical significance determined by *t*-  
822 test,  $n = 6$ .

823 **F:** The figure shows the ligated 3'-UTR and 5'-UTR of circularised RNAs (cRNA). Sequences were  
824 obtained by Sanger sequencing after cRT-PCR (see Methods).

825  $P < 0.05$ ; \*,  $P < 0.0001$ ; \*\*\*\*. Horizontal bars represent mean. Error bars depict standard  
826 deviation.

827  
828

829 **Figure 3:**

830 **A:** Cleavage of NAD-RNAIII by NudC. The reactions were analysed on APBgels. The bands  
831 represent radiolabeled (body labelled) NAD-RNAIII and p-RNAIII. Incubation controls without  
832 enzyme (NC) were included. #1, #2, and #3 depict the three replicates. Highlighted in red and  
833 green are the percentages of NAD-RNAIII and pRNA after incubation. RNA folding plus the  
834 addition of fresh NudC afterwards was done to equilibrate the RNAIII secondary structure pool  
835 again.

836 **B:** RNAIII levels in the three different strains measured by qPCR. Y-axis represents the relative  
837 expression of *hld* divided by the relative expression of the housekeeping gene *gyrB*. Statistical  
838 significance determined by *t*-test,  $n = 6$ .

839 **C:** The two scatter plots show the total amount of Hld and Hla in the supernatant of *S. aureus*  
840 pCG-P3 and pCG-P3(-1G) strains. The Hld intensity was calculated by integration of the two  
841 highest MS peaks: Hld  $m/z = 993.5$  and its formylated version  $m/z = 1002.9$ . Alpha-toxin was  
842 detected by Western blotting and quantified by densitometry. Statistical significance determined  
843 by *t*-test,  $n = 6$ .

844 **D:** Bacterial supernatants were analysed for cytotoxic potential against THP1 macrophages.  
845 Percent cytotoxicity shown was normalised to the Triton control. Statistical significance  
846 determined by one-way ANOVA with Tukey's post-test,  $n = 21$ .

847 \* $P \leq 0.05$ , \*\* $P \leq 0.01$ , \*\*\* $P \leq 0.001$ , \*\*\*\* $P \leq 0.0001$ , ns: non-significant. WT: wild type *S. aureus*  
848 HG001. Horizontal bars represent mean.

849

850

851 **Figure 4:** Analysis of the secondary structure of RNAIII 5'-end variants by SHAPE.  
852 **A:** The bar chart represents the differential SHAPE reactivity (Y-axis) throughout the nucleotides  
853 of the 5'-UTR of RNAIII (X-axis). The blue bars represent NAD-RNAIII leader whereas the light grey  
854 bars represent ppp-RNAIII leader (113 nt long). The region containing the SD sequence and the  
855 H2 loop residues are indicated as a horizontal black lines.  
856 **B:** Bar chart showing a detailed view of the SHAPE reactivity (accessibility) of the SD sequence  
857 from ppp-RNAIII leader (light grey bar) and NAD-RNAIII (blue bar). Full-length (514 nt) ppp-RNAIII  
858 is represented with dark grey bars. A: adenosine, G: guanosine.  
859 **C:** Same as panel A but the chart compares full-length ppp-RNAIII (grey bar) vs NAD/ppp-RNAIII  
860 (green bar) SHAPE experiments.  
861 **D:** Same as panel B but comparing the SD sequence accessibility of full-length ppp-RNAIII (grey  
862 bar) vs NAD/ppp-RNAIII (green bar).  
863 Horizontal bars represent mean. Error bars depict standard deviation.  
864  
865

866 **Figure S1:**

867 **A:** Size selection step during purification of PCR-amplified libraries with NGS primers on a 10%  
868 non-denaturing PA gel stained with SYBR Gold (Thermo Fisher Scientific). The dashed lines  
869 indicate the excised area (between 150 and 300 bp). The numbers indicate three replicates of  
870 minus ADPRC controls. M: Ultra Low Range DNA Ladder (Thermo Fisher Scientific).

871 **B:** TSS analysis of the 21 hits enriched in NAD captureSeq in *S. aureus* ATCC 25923. Note that  
872 position +1 is not shown because all hits were selected to start with adenosine. A: adenosine, T:  
873 thymidine, B: guanosine, C: cytidine.

874 **C:** Northern blot with probes against RNAIII and 5SrRNA. Ten micrograms of total RNA from *S.*  
875 *aureus* ATCC 25923 were loaded on each of the probe-hybridised lanes. Radioactively labeled  
876 RNA Century Marker (Thermo Fisher Scientific) was loaded on the first lane by the left.

877 **D:** APBgels-Northern blot conducted in triplicate with total RNA of *S. aureus* pCG-P3 and pCG-P2  
878 strains and probe against RNAIII. IVT Full-length mixed ppp/NAD-RNAIII was loaded as a control  
879 in the flanking lanes. Note that this experiment shows full-length RNAIII with no DNAzyme  
880 treatment. #1, #2 and #3 represent biological replicates.

881 **E:** Membrane used for the detection of alpha-toxin (Hla) by Western blotting in culture filtrates  
882 from two strains (pCG-P3 and pCG-P3(-1G)) in triplicate (#1, #2 and #3). The marker used was the  
883 PageRuler Prestained Protein Ladder (Thermo Fisher Scientific). Two arrows indicate the bands  
884 corresponding to Hla (target) and protein A (unspecific binding of the antibody).

885 **F:** Stacked extracted ion chromatograms from two different strains in triplicates (blue line pCG-  
886 P3(-1G), black line pCG-P3). The first peak corresponds to delta-toxin (Hld) whereas the second  
887 belongs to its formylated version.

888 **G:** Analysis of SHAPE-treated RNAIII leader (*in vitro*). G, U, A and C represent the RNA nucleobases,  
889 which are equivalent to their cognate dideoxynucleotide used for the ladder generation. The  
890 bases of the SD sequence are highlighted in red. N: NAD-RNAIII leader treated with 1M7 (+) or  
891 with DMSO (-), P: ppp-RNAIII leader treated with 1M7 (+) or with DMSO (-), FL: Full length reverse  
892 transcription product (113 nt).

893 **H:** Agarose gel electrophoresis analysis of total RNA samples from the different *S. aureus* strains.  
894 Total RNA was isolated and treated with DNaseI as described in the methods section. M: 1 Kb  
895 Plus DNA Ladder (Thermo Fisher Scientific). Numbers indicate three replicates of each strain.

896 **I:** Northern Blot of RNA pull-down eluates before PAGE purification. Samples were hybridised  
897 with RNAIII and 5SrRNA radiolabeled probes.

898 **J:** The figure shows an 8% denaturing polyacrylamide gel with the pull-down products of RNAIII  
899 (PD RNAIII) and 5SrRNA (PD 5S). As a size marker ppp-RNAII, I was loaded, together with Riboruler  
900 Low Range RNA Ladder (Thermo Fisher Scientific). The red dashed areas indicate the excised  
901 region of the gels, corresponding to RNAIII and 5SrRNA.

902 **K:** LC/MS-ready (after PAGE purification and band excision) RNAIII and 5SrRNA were subjected to  
903 Northern Blot detection. RNAIII concentration was too low to be detected.

904 **L:** Screening of different DNAzymes (I, II, and III) on mixed ppp/NAD-RNAIII. The figure shows a  
905 Northern blot targeting RNAIII (probe complementary to first 86 nt of RNAIII), after  
906 electrophoresis on 8% polyacrylamide gel (left side) and APBgel (right side). The same ppp/NAD-  
907 RNAIII was loaded without treatment in both gels as a marker. The APB gel shows the separation  
908 between NAD and ppp RNAIII 5'- fragments. DNAzyme II is the most active of the three, acting  
909 quantitatively.



910 **M:** Analysis of purified NAD / ppp-RNAIII leader on an APBgel. The ladder used was Riboruler Low  
911 Range RNA Ladder (Thermo Fisher Scientific).

912  
913

## 914 **11 References**

- 915
- 916 Alwine, J. C., Kemp, D. J., & Stark, G. R. (1977). Method for detection of specific RNAs in  
917 agarose gels by transfer to diazobenzyloxymethyl-paper and hybridization with DNA  
918 probes. *Proc Natl Acad Sci U S A*, *74*(12), 5350-5354.
- 919 Anders, S., & Huber, W. (2010). Differential expression analysis for sequence count data. *Genome*  
920 *Biol*, *11*(10), R106. doi:10.1186/gb-2010-11-10-r106
- 921 Anders, S., Pyl, P. T., & Huber, W. (2015). HTSeq--a Python framework to work with high-  
922 throughput sequencing data. *Bioinformatics*, *31*(2), 166-169.  
923 doi:10.1093/bioinformatics/btu638
- 924 Balaban, N., & Novick, R. P. (1995). Translation of RNAIII, the *Staphylococcus aureus* agr  
925 regulatory RNA molecule, can be activated by a 3'-end deletion. *FEMS Microbiol Lett*,  
926 *133*(1-2), 155-161. doi:10.1111/j.1574-6968.1995.tb07877.x
- 927 Benito, Y., Kolb, F. A., Romby, P., Lina, G., Etienne, J., & Vandenesch, F. (2000). Probing the  
928 structure of RNAIII, the *Staphylococcus aureus* agr regulatory RNA, and identification of  
929 the RNA domain involved in repression of protein A expression. *RNA*, *6*(5), 668-679.  
930 doi:10.1017/s1355838200992550
- 931 Bird, J. G., Zhang, Y., Tian, Y., Panova, N., Barvik, I., Greene, L., . . . Nickels, B. E. (2016). The  
932 mechanism of RNA 5' capping with NAD<sup>+</sup>, NADH and desphospho-CoA. *Nature*,  
933 *535*(7612), 444-447. doi:10.1038/nature18622
- 934 Boisset, S., Geissmann, T., Huntzinger, E., Fechter, P., Bendridi, N., Possedko, M., . . . Romby, P.  
935 (2007). *Staphylococcus aureus* RNAIII coordinately represses the synthesis of virulence  
936 factors and the transcription regulator Rot by an antisense mechanism. *Genes Dev*, *21*(11),  
937 1353-1366. doi:10.1101/gad.423507
- 938 Bronesky, D., Wu, Z., Marzi, S., Walter, P., Geissmann, T., Moreau, K., . . . Romby, P. (2016).  
939 *Staphylococcus aureus* RNAIII and Its Regulon Link Quorum Sensing, Stress Responses,  
940 Metabolic Adaptation, and Regulation of Virulence Gene Expression. *Annu Rev Microbiol*,  
941 *70*, 299-316. doi:10.1146/annurev-micro-102215-095708
- 942 Cahová, H., Winz, M. L., Höfer, K., Nübel, G., & Jäschke, A. (2015). NAD captureSeq indicates  
943 NAD as a bacterial cap for a subset of regulatory RNAs. *Nature*, *519*(7543), 374-377.  
944 doi:10.1038/nature14020
- 945 Charpentier, E., Anton, A. I., Barry, P., Alfonso, B., Fang, Y., & Novick, R. P. (2004). Novel  
946 cassette-based shuttle vector system for gram-positive bacteria. *Appl Environ Microbiol*,  
947 *70*(10), 6076-6085. doi:10.1128/aem.70.10.6076-6085.2004
- 948 Chen, Y. G., Kowtoniuk, W. E., Agarwal, I., Shen, Y., & Liu, D. R. (2009). LC/MS analysis of  
949 cellular RNA reveals NAD-linked RNA. *Nat Chem Biol*, *5*(12), 879-881.  
950 doi:10.1038/nchembio.235
- 951 David, M. Z., & Daum, R. S. (2010). Community-associated methicillin-resistant *Staphylococcus*  
952 *aureus*: epidemiology and clinical consequences of an emerging epidemic. *Clin Microbiol*  
953 *Rev*, *23*(3), 616-687. doi:10.1128/CMR.00081-09

- 954 Frick, D. N., & Bessman, M. J. (1995). Cloning, purification, and properties of a novel NADH  
955 pyrophosphatase. Evidence for a nucleotide pyrophosphatase catalytic domain in MutT-  
956 like enzymes. *Journal of Biological Chemistry*, *270*(4), 1529-1534.
- 957 Frindert, J., Zhang, Y., Nubel, G., Kahloon, M., Kolmar, L., Hotz-Wagenblatt, A., . . . Jaschke, A.  
958 (2018). Identification, Biosynthesis, and Decapping of NAD-Capped RNAs in *B. subtilis*.  
959 *Cell Rep*, *24*(7), 1890-1901 e1898. doi:10.1016/j.celrep.2018.07.047
- 960 Garcia-Betancur, J. C., Goni-Moreno, A., Horger, T., Schott, M., Sharan, M., Eikmeier, J., . . .  
961 Lopez, D. (2017). Cell differentiation defines acute and chronic infection cell types in  
962 *Staphylococcus aureus*. *Elife*, *6*. doi:10.7554/eLife.28023
- 963 Geisinger, E., Adhikari, R. P., Jin, R., Ross, H. F., & Novick, R. P. (2006). Inhibition of rot  
964 translation by RNAIII, a key feature of agr function. *Mol Microbiol*, *61*(4), 1038-1048.  
965 doi:10.1111/j.1365-2958.2006.05292.x
- 966 Helle, L., Kull, M., Mayer, S., Marincola, G., Zelder, M. E., Goerke, C., . . . Bertram, R. (2011).  
967 Vectors for improved Tet repressor-dependent gradual gene induction or silencing in  
968 *Staphylococcus aureus*. *Microbiology*, *157*(Pt 12), 3314-3323. doi:10.1099/mic.0.052548-  
969 0
- 970 Höfer, K., Abele, F., Schlotthauer, J., & Jäschke, A. (2016). Synthesis of 5'-NAD-Capped RNA.  
971 *Bioconjugate Chemistry*, *27*(4), 874-877. doi:10.1021/acs.bioconjchem.6b00072
- 972 Howarth, M., Takao, K., Hayashi, Y., & Ting, A. Y. (2005). Targeting quantum dots to surface  
973 proteins in living cells with biotin ligase. *Proc Natl Acad Sci U S A*, *102*(21), 7583-7588.  
974 doi:10.1073/pnas.0503125102
- 975 Huang, F. (2003). Efficient incorporation of CoA, NAD and FAD into RNA by in vitro  
976 transcription. *Nucleic Acids Research*, *31*(3), e8.
- 977 Huntzinger, E., Boisset, S., Saveanu, C., Benito, Y., Geissmann, T., Namane, A., . . . Romby, P.  
978 (2005). *Staphylococcus aureus* RNAIII and the endoribonuclease III coordinately regulate  
979 spa gene expression. *Embo Journal*, *24*(4), 824-835. doi:10.1038/sj.emboj.7600572
- 980 Igloi, G. L., & Kossel, H. (1985). Affinity electrophoresis for monitoring terminal phosphorylation  
981 and the presence of queuosine in RNA. Application of polyacrylamide containing a  
982 covalently bound boronic acid. *Nucleic acids research*, *13*(19), 6881-6898.  
983 doi:10.1093/nar/13.19.6881
- 984 Janzon, L., & Arvidson, S. (1990). The Role of the Delta-Lysin Gene (Hld) in the Regulation of  
985 Virulence Genes by the Accessory Gene Regulator (Agr) in *Staphylococcus-Aureus*. *Embo*  
986 *Journal*, *9*(5), 1391-1399.
- 987 Janzon, L., Lofdahl, S., & Arvidson, S. (1989). Identification and nucleotide sequence of the delta-  
988 lysin gene, hld, adjacent to the accessory gene regulator (agr) of *Staphylococcus aureus*.  
989 *Mol Gen Genet*, *219*(3), 480-485.
- 990 Jaschke, A., Hofer, K., Nubel, G., & Frindert, J. (2016). Cap-like structures in bacterial RNA and  
991 epitranscriptomic modification. *Curr Opin Microbiol*, *30*, 44-49.  
992 doi:10.1016/j.mib.2015.12.009
- 993 Jiao, X., Doamekpor, S. K., Bird, J. G., Nickels, B. E., Tong, L., Hart, R. P., & Kiledjian, M.  
994 (2017). 5' End Nicotinamide Adenine Dinucleotide Cap in Human Cells Promotes RNA  
995 Decay through DXO-Mediated deNADding. *Cell*, *168*(6), 1015-1027 e1010.  
996 doi:10.1016/j.cell.2017.02.019
- 997 Joyce, G. F. (2001). RNA cleavage by the 10-23 DNA enzyme. *Methods Enzymol*, *341*, 503-517.  
998 doi:10.1016/s0076-6879(01)41173-6

- 999 Kellner, S., Neumann, J., Rosenkranz, D., Lebedeva, S., Ketting, R. F., Zischler, H., . . . Helm, M.  
1000 (2014). Profiling of RNA modifications by multiplexed stable isotope labelling. *Chem*  
1001 *Commun (Camb)*, *50*(26), 3516-3518. doi:10.1039/c3cc49114e
- 1002 Koenig, R. L., Ray, J. L., Maleki, S. J., Smeltzer, M. S., & Hurlburt, B. K. (2004). Staphylococcus  
1003 aureus AgrA binding to the RNAIII-agr regulatory region. *J Bacteriol*, *186*(22), 7549-  
1004 7555. doi:10.1128/JB.186.22.7549-7555.2004
- 1005 Laederach, A., Das, R., Vicens, Q., Pearlman, S. M., Brenowitz, M., Herschlag, D., & Altman, R.  
1006 B. (2008). Semiautomated and rapid quantification of nucleic acid footprinting and  
1007 structure mapping experiments. *Nature Protocols*, *3*(9), 1395-1401.  
1008 doi:10.1038/nprot.2008.134
- 1009 Li, H. (2013). Aligning sequence reads, clone sequences and assembly contigs with BWA-MEM.  
1010 *ArXiv*, *1303*.
- 1011 Li, M., Diep, B. A., Villaruz, A. E., Braughton, K. R., Jiang, X., DeLeo, F. R., . . . Otto, M. (2009).  
1012 Evolution of virulence in epidemic community-associated methicillin-resistant  
1013 Staphylococcus aureus. *Proc Natl Acad Sci U S A*, *106*(14), 5883-5888.  
1014 doi:10.1073/pnas.0900743106
- 1015 Lioliou, E., Fechter, P., Caldelari, I., Jester, B. C., Dubrac, S., Helfer, A.-C., . . . Geissmann, T.  
1016 (2016). Various checkpoints prevent the synthesis of Staphylococcus aureus peptidoglycan  
1017 hydrolase LytM in the stationary growth phase. *RNA Biology*, *13*(4), 427-440.  
1018 doi:10.1080/15476286.2016.1153209
- 1019 Livak, K. J., & Schmittgen, T. D. (2001). Analysis of relative gene expression data using real-time  
1020 quantitative PCR and the 2(-Delta Delta C(T)) Method. *Methods*, *25*(4), 402-408.  
1021 doi:10.1006/meth.2001.1262
- 1022 Lowy, F. D. (1998). Medical progress - Staphylococcus aureus infections. *New England Journal*  
1023 *of Medicine*, *339*(8), 520-532. doi:Doi 10.1056/Nejm199808203390806
- 1024 Morfeldt, E., Taylor, D., von Gabain, A., & Arvidson, S. (1995). Activation of alpha-toxin  
1025 translation in Staphylococcus aureus by the trans-encoded antisense RNA, RNAIII. *Embo*  
1026 *Journal*, *14*(18), 4569-4577.
- 1027 Mortimer, S. A., & Weeks, K. M. (2007). A fast-acting reagent for accurate analysis of RNA  
1028 secondary and tertiary structure by SHAPE chemistry. *J Am Chem Soc*, *129*(14), 4144-  
1029 4145. doi:10.1021/ja0704028
- 1030 Munzenmayer, L., Geiger, T., Daiber, E., Schulte, B., Autenrieth, S. E., Fraunholz, M., & Wolz,  
1031 C. (2016). Influence of Sae-regulated and Agr-regulated factors on the escape of  
1032 Staphylococcus aureus from human macrophages. *Cell Microbiol*, *18*(8), 1172-1183.  
1033 doi:10.1111/cmi.12577
- 1034 Nicol, J. W., Helt, G. A., Blanchard, S. G., Jr., Raja, A., & Loraine, A. E. (2009). The Integrated  
1035 Genome Browser: free software for distribution and exploration of genome-scale datasets.  
1036 *Bioinformatics*, *25*(20), 2730-2731. doi:10.1093/bioinformatics/btp472
- 1037 Novick, R. P., Projan, S. J., Kornblum, J., Ross, H. F., Ji, G., Kreiswirth, B., . . . Novick, R. P.  
1038 (1995). The agr P2 operon: An autocatalytic sensory transduction system in  
1039 Staphylococcus aureus. *Molecular and General Genetics MGG*, *248*(4), 446-458.  
1040 doi:10.1007/bf02191645
- 1041 Novick, R. P., Ross, H. F., Projan, S. J., Kornblum, J., Kreiswirth, B., & Moghazeh, S. (1993).  
1042 Synthesis of Staphylococcal Virulence Factors Is Controlled by a Regulatory Rna  
1043 Molecule. *Embo Journal*, *12*(10), 3967-3975.

- 1044 Nübel, G., Sorgenfrei, F. A., & Jäschke, A. (2017). Boronate affinity electrophoresis for the  
1045 purification and analysis of cofactor-modified RNAs. *Methods*, *117*, 14-20.  
1046 doi:10.1016/j.ymeth.2016.09.008
- 1047 Paharik, A. E., Salgado-Pabon, W., Meyerholz, D. K., White, M. J., Schlievert, P. M., & Horswill,  
1048 A. R. (2016). The Spl Serine Proteases Modulate *Staphylococcus aureus* Protein  
1049 Production and Virulence in a Rabbit Model of Pneumonia. *mSphere*, *1*(5).  
1050 doi:10.1128/mSphere.00208-16
- 1051 Peng, H. L., Novick, R. P., Kreiswirth, B., Kornblum, J., & Schlievert, P. (1988). Cloning,  
1052 characterization, and sequencing of an accessory gene regulator (*agr*) in *Staphylococcus*  
1053 *aureus*. *J Bacteriol*, *170*(9), 4365-4372.
- 1054 Peschel, A., & Otto, M. (2013). Phenol-soluble modulins and staphylococcal infection. *Nature*  
1055 *Reviews Microbiology*, *11*, 667. doi:10.1038/nrmicro3110
- 1056 Quave, C. L., Lyles, J. T., Kavanaugh, J. S., Nelson, K., Parlet, C. P., Crosby, H. A., . . . Horswill,  
1057 A. R. (2016). Correction: *Castanea sativa* (European Chestnut) Leaf Extracts Rich in  
1058 Ursene and Oleanene Derivatives Block *Staphylococcus aureus* Virulence and  
1059 Pathogenesis without Detectable Resistance. *PLoS One*, *11*(9), e0163655.  
1060 doi:10.1371/journal.pone.0163655
- 1061 Queck, S. Y., Jameson-Lee, M., Villaruz, A. E., Bach, T. H., Khan, B. A., Sturdevant, D. E., . . .  
1062 Otto, M. (2008). RNAIII-independent target gene control by the *agr* quorum-sensing  
1063 system: insight into the evolution of virulence regulation in *Staphylococcus aureus*. *Mol*  
1064 *Cell*, *32*(1), 150-158. doi:10.1016/j.molcel.2008.08.005
- 1065 Recsei, P., Kreiswirth, B., O'Reilly, M., Schlievert, P., Gruss, A., & Novick, R. P. (1986).  
1066 Regulation of exoprotein gene expression in *Staphylococcus aureus* by *agr*. *Mol Gen*  
1067 *Genet*, *202*(1), 58-61.
- 1068 Reed, S. B., Wesson, C. A., Liou, L. E., Trumble, W. R., Schlievert, P. M., Bohach, G. A., &  
1069 Bayles, K. W. (2001). Molecular Characterization of a Novel *Staphylococcus aureus*  
1070 Serine Protease Operon. *Infection and Immunity*, *69*(3), 1521-1527.  
1071 doi:10.1128/iai.69.3.1521-1527.2001
- 1072 Reuter, J. S., & Mathews, D. H. (2010). RNAstructure: software for RNA secondary structure  
1073 prediction and analysis. *BMC Bioinformatics*, *11*, 129. doi:10.1186/1471-2105-11-129
- 1074 Reynolds, J., & Wigneshweraraj, S. (2011). Molecular insights into the control of transcription  
1075 initiation at the *Staphylococcus aureus agr* operon. *J Mol Biol*, *412*(5), 862-881.  
1076 doi:10.1016/j.jmb.2011.06.018
- 1077 Said-Salim, B., Dunman, P. M., McAleese, F. M., Macapagal, D., Murphy, E., McNamara, P. J., .  
1078 . . Kreiswirth, B. N. (2003). Global regulation of *Staphylococcus aureus* genes by Rot. *J*  
1079 *Bacteriol*, *185*(2), 610-619. doi:10.1128/jb.185.2.610-619.2003
- 1080 Slomovic, S., & Schuster, G. (2013). Circularized RT-PCR (cRT-PCR): analysis of the 5' ends, 3'  
1081 ends, and poly(A) tails of RNA. *Methods Enzymol*, *530*, 227-251. doi:10.1016/B978-0-12-  
1082 420037-1.00013-0
- 1083 Traber, K. E., Lee, E., Benson, S., Corrigan, R., Cantera, M., Shopsin, B., & Novick, R. P. (2008).  
1084 *agr* function in clinical *Staphylococcus aureus* isolates. *Microbiology*, *154*(Pt 8), 2265-  
1085 2274. doi:10.1099/mic.0.2007/011874-0
- 1086 Vvedenskaya, I. O., Bird, J. G., Zhang, Y., Zhang, Y., Jiao, X., Barvik, I., . . . Nickels, B. E. (2018).  
1087 CapZyme-Seq Comprehensively Defines Promoter-Sequence Determinants for RNA 5'  
1088 Capping with NAD<sup>+</sup>. *Mol Cell*, *70*(3), 553-564 e559. doi:10.1016/j.molcel.2018.03.014

- 1089 Walters, R. W., Matheny, T., Mizoue, L. S., Rao, B. S., Muhlrاد, D., & Parker, R. (2017).  
1090 Identification of NAD<sup>+</sup> capped mRNAs in *Saccharomyces cerevisiae*. *Proc Natl Acad Sci*  
1091 *U S A*, *114*(3), 480-485. doi:10.1073/pnas.1619369114
- 1092 Wang, Y., Li, S., Zhao, Y., You, C., Le, B., Gong, Z., . . . Chen, X. (2019). NAD(+)-capped RNAs  
1093 are widespread in the Arabidopsis transcriptome and can probably be translated. *Proc Natl*  
1094 *Acad Sci U S A*. doi:10.1073/pnas.1903682116
- 1095 Weeks, K. M., & Mauger, D. M. (2011). Exploring RNA structural codes with SHAPE chemistry.  
1096 *Acc Chem Res*, *44*(12), 1280-1291. doi:10.1021/ar200051h
- 1097 Wilkinson, K. A., Merino, E. J., & Weeks, K. M. (2006). Selective 2'-hydroxyl acylation analyzed  
1098 by primer extension (SHAPE): quantitative RNA structure analysis at single nucleotide  
1099 resolution. *Nature Protocols*, *1*(3), 1610-1616. doi:10.1038/nprot.2006.249
- 1100 Winz, M. L., Cahová, H., Nübel, G., Frindert, J., Höfer, K., & Jäschke, A. (2017). Capture and  
1101 sequencing of NAD-capped RNA sequences with NAD captureSeq. *Nature Protocols*,  
1102 *12*(1), 122-149. doi:10.1038/nprot.2016.163
- 1103 Zhang, H., Zhong, H., Zhang, S., Shao, X., Ni, M., Cai, Z., . . . Xia, Y. (2019). NAD tagSeq reveals  
1104 that NAD(+)-capped RNAs are mostly produced from a large number of protein-coding  
1105 genes in Arabidopsis. *Proc Natl Acad Sci U S A*. doi:10.1073/pnas.1903683116  
1106  
1107

1108 **12 Figures**

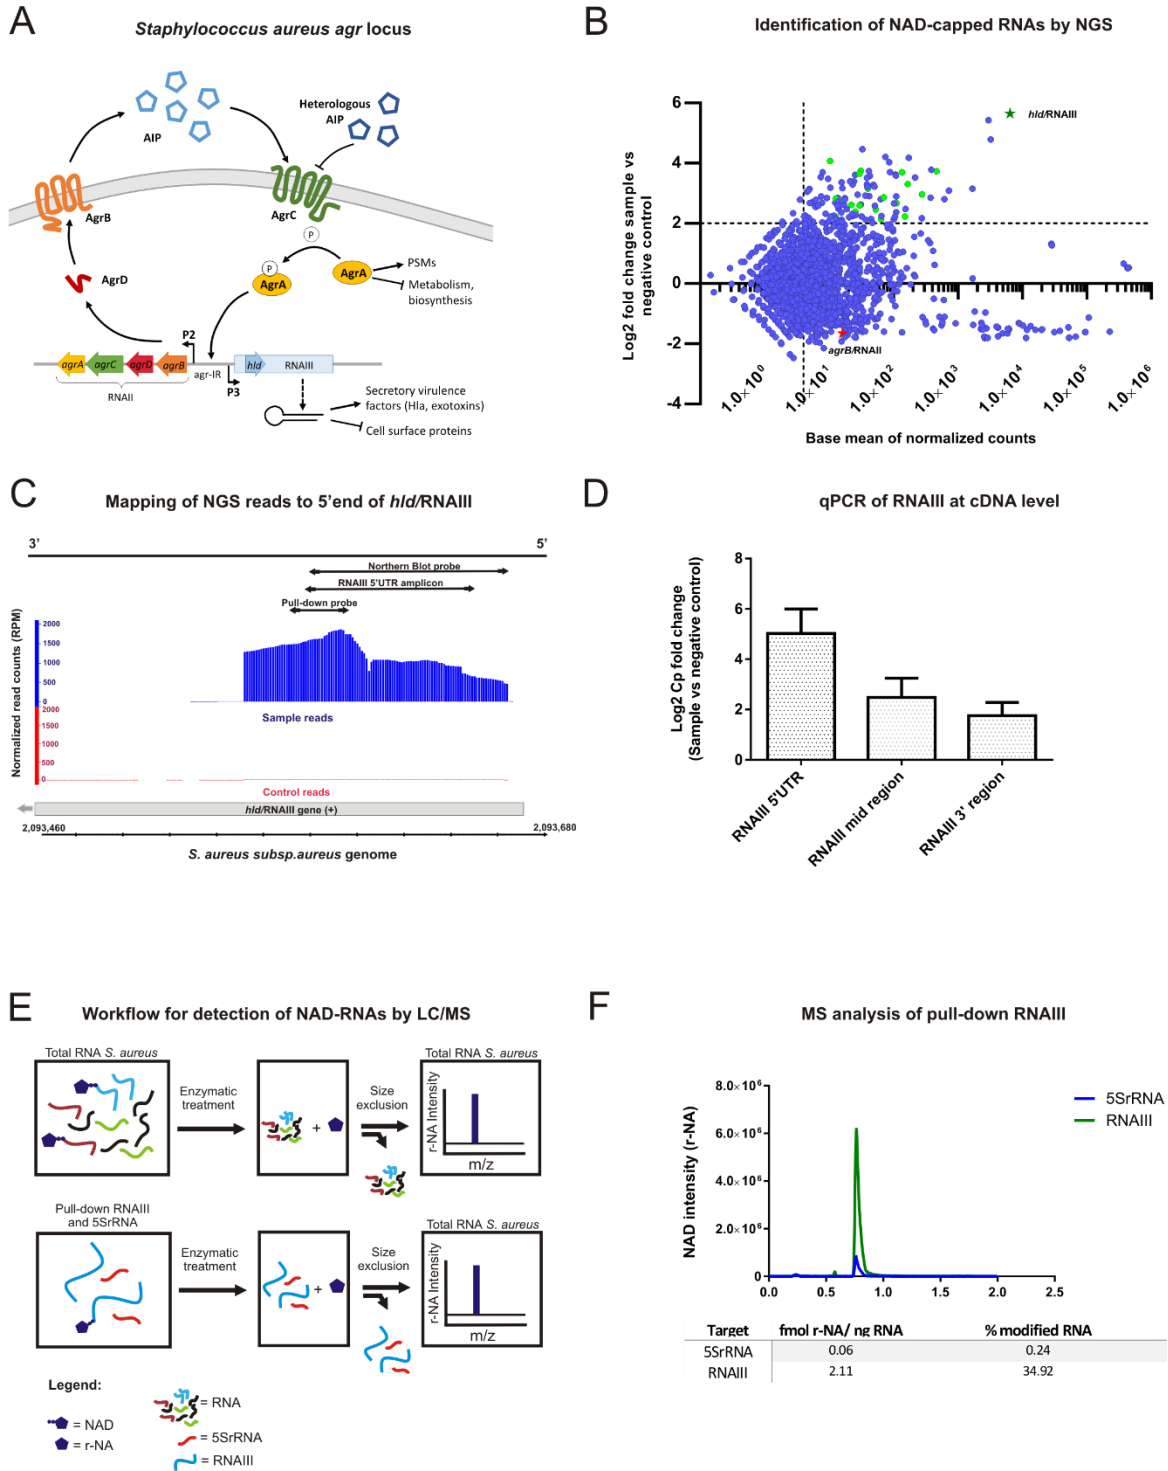

1109  
1110

**Figure 1**

1111

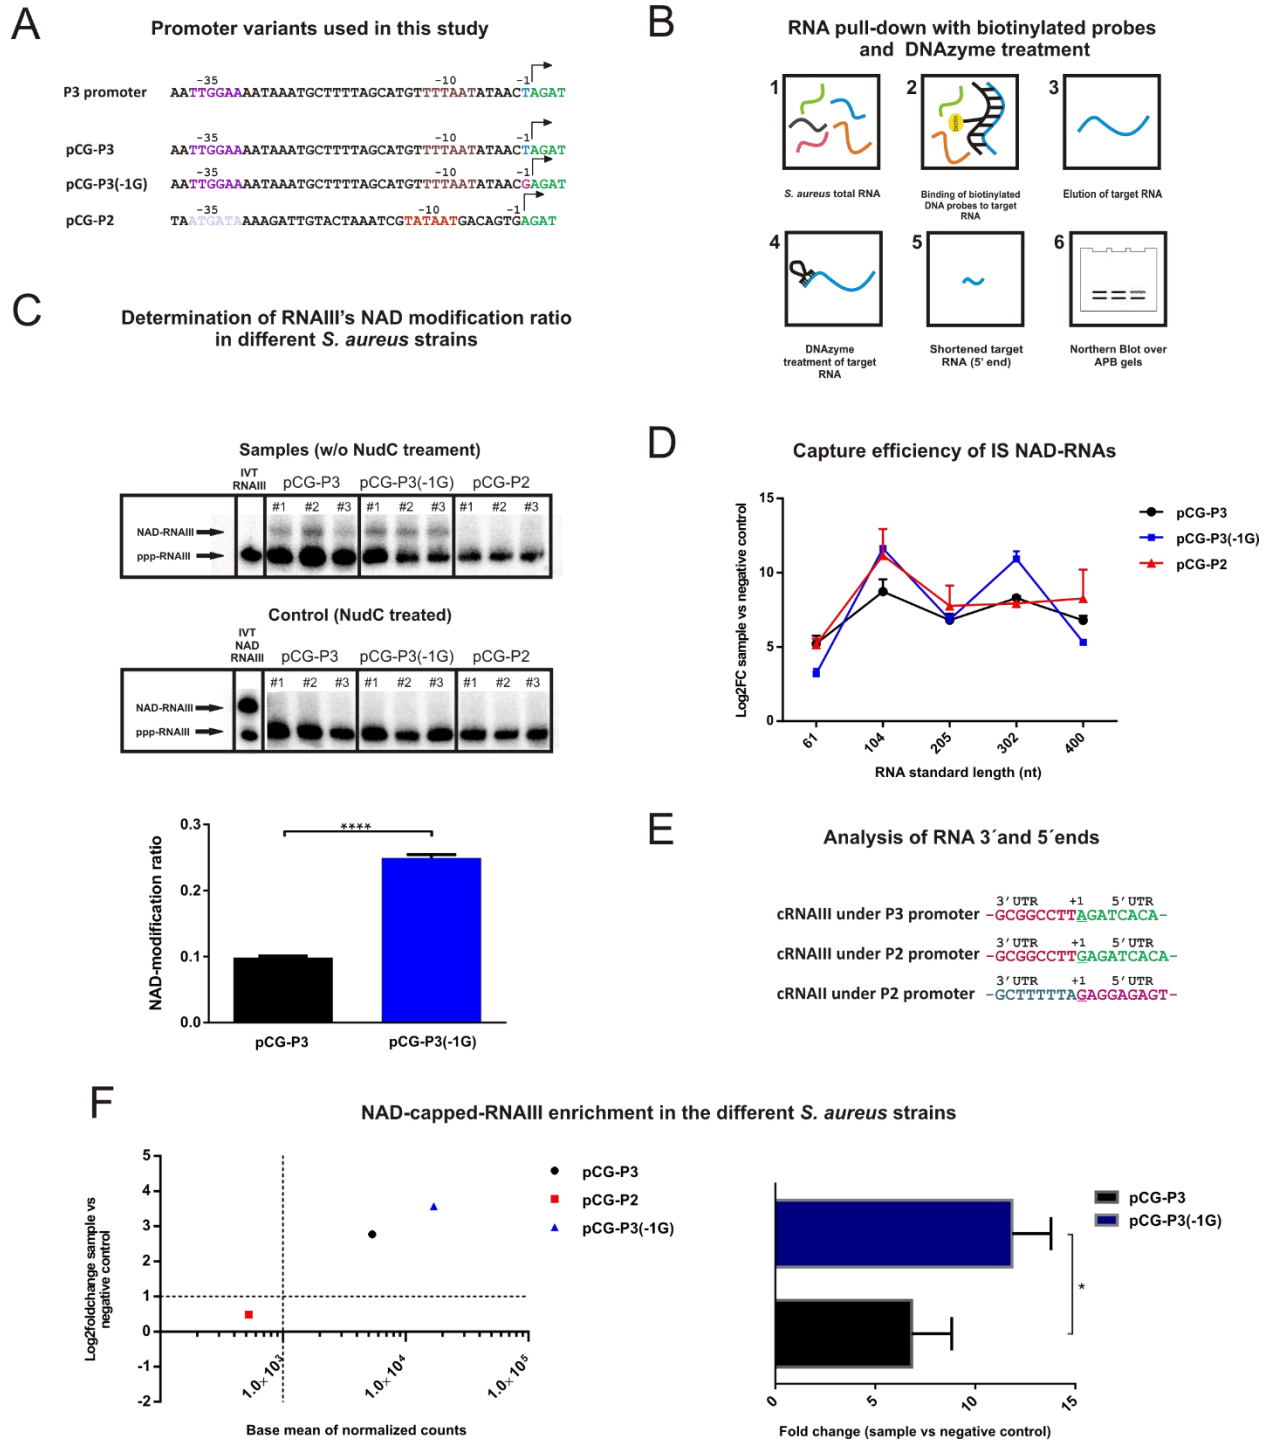

1112  
1113

Figure 2

1114

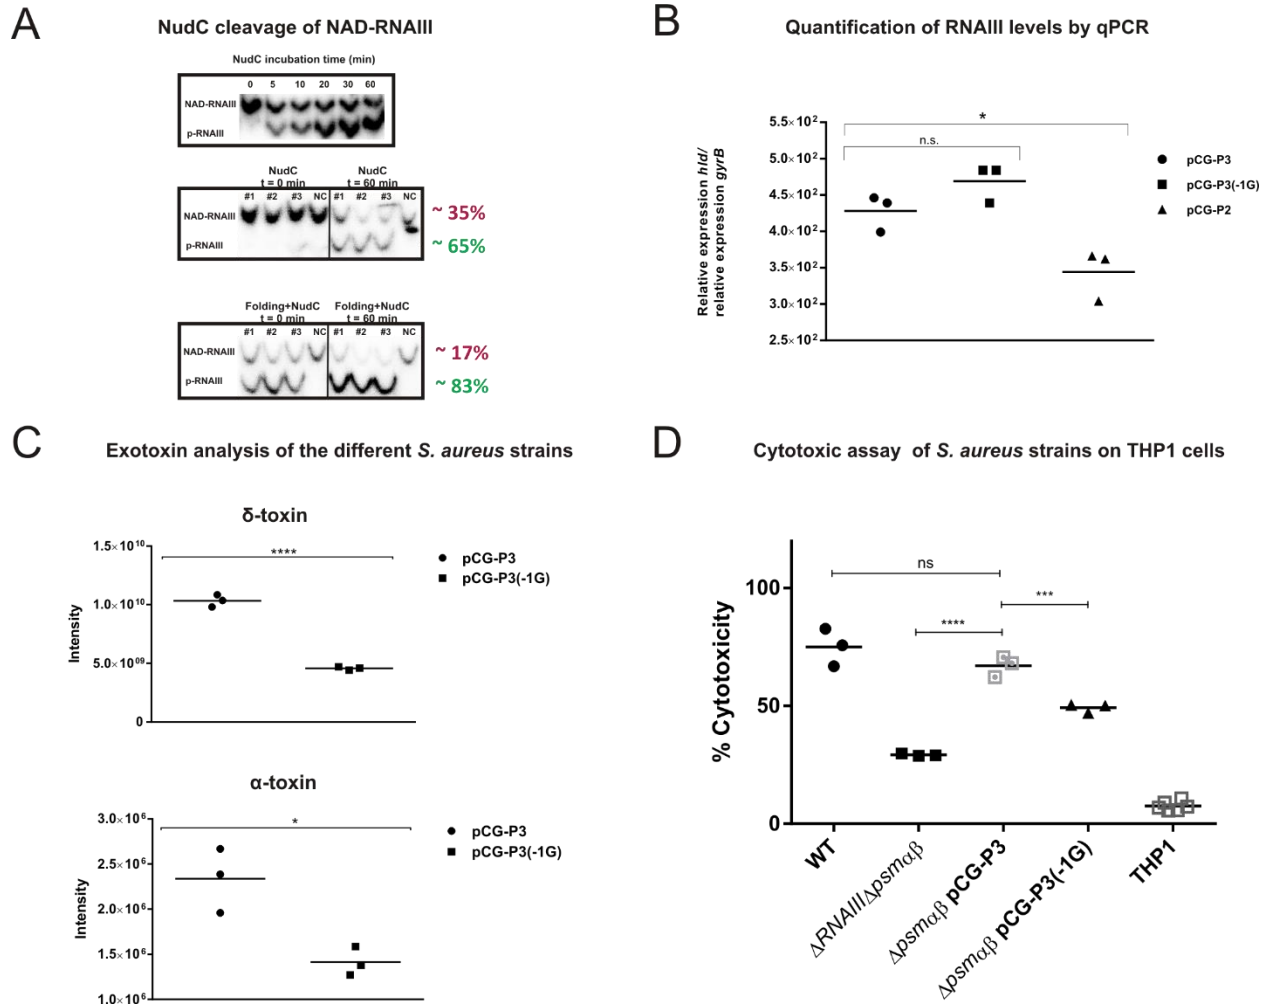

1115

1116

**Figure 3**



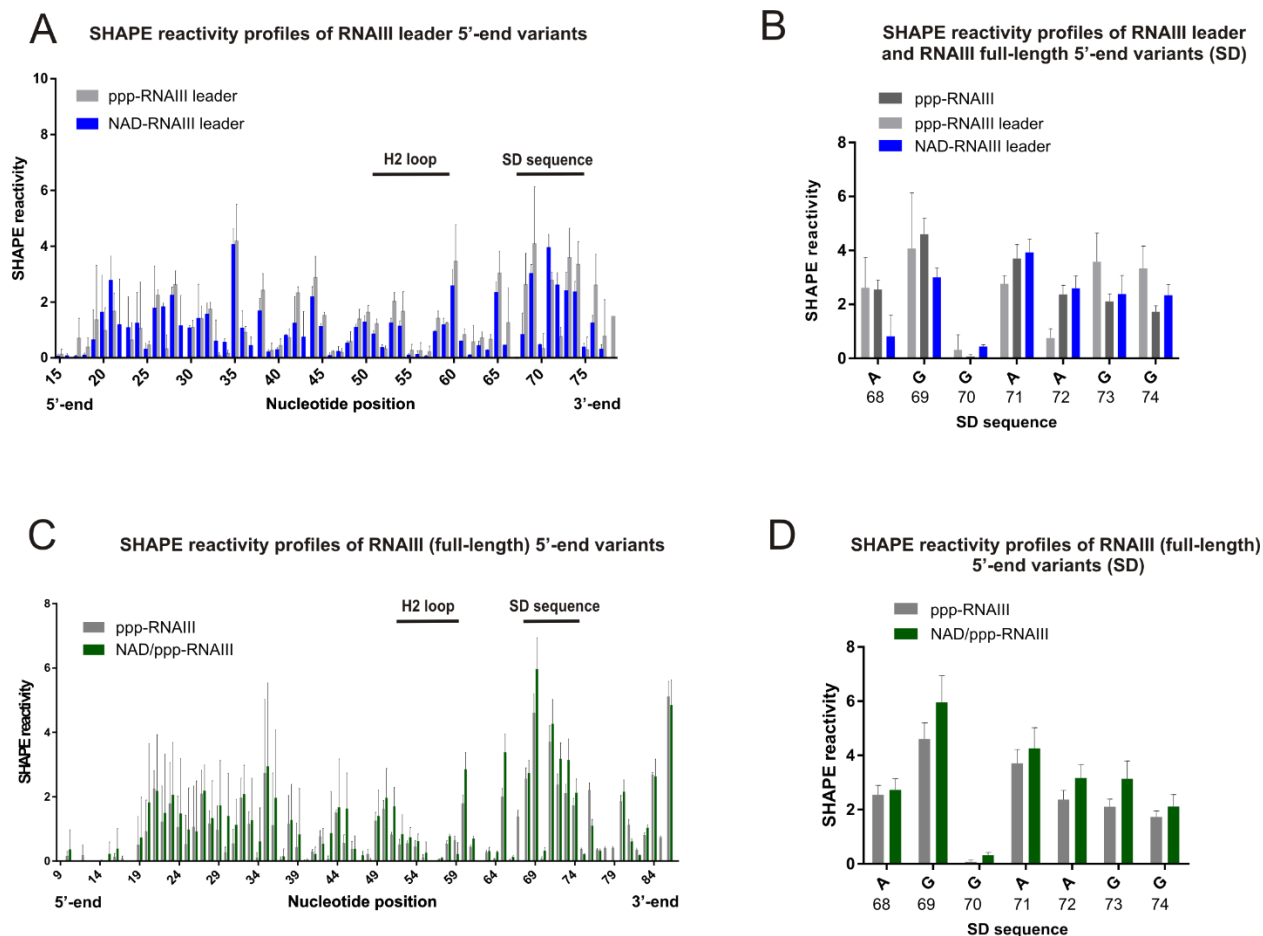

1117  
1118 **Figure 4**  
1119

1120 **13 Supplementary tables**

1121 **Table S1:** Detection of NAD by UPLC/MS/MS in total RNA samples from *S. aureus*. I and II:  
1122 reactions by duplicate performed with NudC. Column 2 shows the NudC-treated samples minus  
1123 the negative control (non-treated). The third column shows the estimated NAD-RNA molecules  
1124 per cell.  
1125

|                     | Sample (fmol NAD/ $\mu$ g RNA) | Sample - negative control (fmol NAD/ $\mu$ g RNA) | Estimated NAD-RNA molecules per cell |
|---------------------|--------------------------------|---------------------------------------------------|--------------------------------------|
| <i>S. aureus</i> I  | 31.52                          | 23.61                                             | 839                                  |
| <i>S. aureus</i> II | 34.81                          | 26.89                                             | 955                                  |

1126

1127 **Table S2:** Enriched hits after NAD captureSeq in *S. aureus* ATCC 25923 strain. Base mean:  
 1128 normalised mapped reads, Log2FC: Log2 Fold change (sample vs negative control).

| Gene annotation number | Gene product                                             | Base mean | Log2FC | P-value |
|------------------------|----------------------------------------------------------|-----------|--------|---------|
| SAOUHSC_00070          | HTH-type transcriptional regulator SarS                  | 63.88     | 2.15   | 0.016   |
| SAOUHSC_00086          | 3-ketoacyl-acyl carrier protein reductase putative       | 166.37    | 3.30   | 0.000   |
| SAOUHSC_00204          | Globin domain protein                                    | 111.18    | 2.67   | 0.002   |
| SAOUHSC_00615          | Haloacid dehalogenase-like hydrolase putative            | 39.83     | 3.15   | 0.002   |
| SAOUHSC_00781          | HPr kinase/phosphorylase                                 | 25.40     | 2.39   | 0.022   |
| SAOUHSC_00834          | Thioredoxin putative                                     | 12.54     | 2.82   | 0.011   |
| SAOUHSC_00861          | Lipoyl synthase                                          | 52.53     | 2.47   | 0.010   |
| SAOUHSC_01162          | Lipoprotein signal peptidase                             | 10.36     | 4.07   | 0.000   |
| SAOUHSC_01176          | Guanylate kinase                                         | 25.63     | 2.28   | 0.032   |
| SAOUHSC_01406          | Acylphosphatase                                          | 14.93     | 2.70   | 0.008   |
| SAOUHSC_01617          | Arginine repressor                                       | 31.13     | 3.74   | 0.000   |
| SAOUHSC_01685          | Heat-inducible transcription repressor HrcA              | 464.91    | 3.73   | 0.000   |
| SAOUHSC_02118          | Glutamyl-tRNA(Gln) amidotransferase subunit              | 29.51     | 3.65   | 0.000   |
| SAOUHSC_02260          | Delta-hemolysin precursor/RNAIII                         | 6404.64   | 5.64   | 0.000   |
| SAOUHSC_02270          | Ammonium transporter                                     | 12.55     | 2.22   | 0.047   |
| SAOUHSC_02577          | Putative 2-hydroxyacid dehydrogenase                     | 276.48    | 2.96   | 0.001   |
| SAOUHSC_02696          | FmhA protein putative                                    | 70.17     | 2.86   | 0.002   |
| SAOUHSC_02920          | 2-dehydropantoate 2-reductase                            | 135.44    | 3.70   | 0.000   |
| SAOUHSC_02922          | L-lactate dehydrogenase                                  | 149.88    | 2.23   | 0.022   |
| SAOUHSC_02942          | Anaerobic ribonucleoside-triphosphate reductase putative | 22.16     | 2.61   | 0.008   |
| SAOUHSC_03045          | Cold shock protein putative                              | 29.67     | 2.60   | 0.009   |

1129

1130 **Table S3:** Oligonucleotides used in this study

| Primer name                 | Sequence (5'-3')                                                  | Application                                                                    |
|-----------------------------|-------------------------------------------------------------------|--------------------------------------------------------------------------------|
| Fwd-P3-RNAIII               | CGCGCGGATCCATAAAAAAATTTACAGTTAAGA<br>ATAAAAAACG                   | pCG-671 cloning                                                                |
| Rv-P3-RNAIII                | GCGCGAATTCAAGGCCGCGAGCTTG                                         | pCG-671 cloning                                                                |
| Fwd-P2                      | GCGCGCGGATCCACAAATTACATTTAACAGTTAA<br>G                           | pCG-672 cloning                                                                |
| Rv-P2hyb                    | CCATCACATCTCTGTGATCTCACTGTCATTATACG<br>ATTTAG                     | pCG-672 cloning                                                                |
| Fwd-RNAIII                  | AGATCACAGAGATGTGATGG                                              | pCG-672 cloning                                                                |
| Rv-RNAIII                   | GCGCGAATTCAAGGCCGCGAGC                                            | pCG-672 cloning                                                                |
| Mut FW                      | GTTATATTTAAACATGCT                                                | pCG-673 cloning                                                                |
| Mut -1G RV                  | GAGATCACAGAGATG                                                   | pCG-673 cloning                                                                |
| RNAIII term<br>insertion FW | TAATGAGGCGCGCCTATTC                                               | pCG-692, pCG-693 and pCG-694 cloning,<br>introduction native RNAIII terminator |
| RNAIII term<br>insertion RV | CAAAAAAGGCCGCGAGCTT                                               | pCG-692, pCG-693 and pCG-694 cloning,<br>introduction native RNAIII terminator |
| RNAIII 5'UTR<br>FW          | GTGATGGAAAATAGTTGATGAGT                                           | qPCR                                                                           |
| RNAIII 5'UTR<br>RV          | GCCATTGAAATCACTCCTTCC                                             | qPCR                                                                           |
| RNAIII mid<br>FW            | GAGTTAGTTTCCTTGGACTCAG                                            | qPCR                                                                           |
| RNAIII mid RV               | GTTGTTTACGATAGCTTACATGC                                           | qPCR                                                                           |
| RNAIII 3' FW                | GCATGTAAGCTATCGTAAACAAC                                           | qPCR                                                                           |
| RNAIII 3' RV                | AGGGGCTCACGACCATACTT                                              | qPCR                                                                           |
| 5S rRNA FW                  | TATAGCAAGGAGGTCACACCT                                             | qPCR                                                                           |
| 5S rRNA RV                  | CTACCATCGACGCTAAGGAG                                              | qPCR                                                                           |
| gyrB FW                     | CAAATGATCACAGCATTGGTACAG                                          | qPCR                                                                           |
| gyrB RV                     | CGGCATCAGTCATAATGACGAT                                            | qPCR                                                                           |
| RNAIII NB<br>probe FW       | TAATACGACTCACTATAATTGAAATCACTCCTTCC<br>TTAATTAAGATAAAAAATTCTTAAAA | Template for Northern Blot probe                                               |
| RNAIII NB<br>probe RV       | AGATCACAGAGATGTGATGGAAAATAGTTGATG<br>AGTTGTTTAAATTTAAGAATTTTATC   | Template for Northern Blot probe                                               |
| 5SrRNA NB<br>probe FW       | TAATACGACTCACTATATAAGTTTCGACTACCATCG<br>ACGCTAAGGAGCTTAACTTCTGTGT | Template for Northern Blot probe                                               |
| 5SrRNA NB<br>probe RV       | TCTGGTGACTATAGCAAGGAGGTCACACCTGTTC<br>CCATGCCGAACACAGAAGTTAAGCTC  | Template for Northern Blot probe                                               |
| RNAIII PD<br>probe          | CTTGTGCCATTGAAATCACTCCTTCTT-biotin                                | Pull-down probe                                                                |
| 5SrRNA PD<br>probe          | GGTGTGACCTCCTTGCTATAGTCACCAGA-biotin                              | Pull-down probe                                                                |
| RNAIII<br>template T7<br>FW | TAATACGACTCACTATAAGATCACAGAGATGTGA<br>TGG                         | Template for <i>in vitro</i> transcription                                     |
| RNAIII<br>template RV       | AAGGCCGCGAGCTTGG                                                  | Template for <i>in vitro</i> transcription                                     |

|                       |                                        |                                            |
|-----------------------|----------------------------------------|--------------------------------------------|
| RNAIII DNA enzyme I   | GTTCACTGTGGGCTAGCTACAACGACGATAATCCAT   | RNAIII cleavage by DNA enzyme              |
| RNAIII DNA enzyme II  | CGATAATCCAGGCTAGCTACAACGATTTACTAAGTCA  | RNAIII cleavage by DNA enzyme              |
| RNAIII DNA enzyme III | CGATTGTTGAAAGGCTAGCTACAACGAGATATCTTGTG | RNAIII cleavage by DNA enzyme              |
| RNAIII R1             | TGTTCACTGTGTCGATAATCC                  | cRT-PCR RNAIII                             |
| RNAIII F1             | TCCTTGGAAGTCAAGTCTATG                  | cRT-PCR RNAIII                             |
| RNAIII R2             | CACCGATTGTTGAAATGATATC                 | cRT-PCR RNAIII                             |
| RNAIII F2             | GCTATCGTAAACAACATCGA                   | cRT-PCR RNAIII                             |
| RNAII F1              | GTGGCAGTAATTCAGTGTATG                  | cRT-PCR RNAII                              |
| RNAII R1              | GCATCCCTAATCGTACTTGC                   | cRT-PCR RNAII                              |
| RNAII R2              | GATACGTGGCAAAGTGGTC                    | cRT-PCR RNAII                              |
| IS1 T7 FW             | TAATACGACTCACTATAATATGCTTTGTATGTTCCG   | Template for RNA internal standard         |
| IS1 RV                | CATTCTTTGCCTGTGACAGAC                  | Template for RNA internal standard         |
| IS2 T7 FW             | TAATACGACTCACTATAAGCCACGTCACCTGTCCGG   | Template for RNA internal standard         |
| IS2 RV                | TAATACGACTCACTATAAGCCACGTCACCTGTCCGG   | Template for RNA internal standard         |
| IS3 T7 FW             | TAATACGACTCACTATAAGCGCCGTCGGGCGTTGGT   | Template for RNA internal standard         |
| IS3 RV                | GGCATATCCCTGGCGGGTGG                   | Template for RNA internal standard         |
| IS4 T7 FW             | TAATACGACTCACTATAACTATCTGAACCAAATATATC | Template for RNA internal standard         |
| IS4 RV                | GGCATTAAAGCAAATTTATC                   | Template for RNA internal standard         |
| RNAIII-leader-FW      | TAATACGACTCACTATAAGATCACAGAGATGTGATG   | Template for <i>in vitro</i> transcription |
| RNAIII-leader-RV      | CCGATTGTTGAAATGATATC                   | Template for <i>in vitro</i> transcription |
| SHAPE-RT1             | CTAAGTCACCGATTGTTGAAATG                | Reverse transcription for RNAIII SHAPE     |

1131  
1132

1133 **Table S4:** IS NAD-RNAs used for NAD captureSeq with their sequence.

| IS-RNA | RNA sequence                                                                                                                                                                                                                                                                                                                                                                                                                   |
|--------|--------------------------------------------------------------------------------------------------------------------------------------------------------------------------------------------------------------------------------------------------------------------------------------------------------------------------------------------------------------------------------------------------------------------------------|
| IS 1   | AUAUGCUUUGUAUGUUCACGACGACCCGGGUCACGCACGCGGGUCUGACAGGCAAAGAAUG                                                                                                                                                                                                                                                                                                                                                                  |
| IS 2   | AGCCACGUCACCUUGUCCGUAUCCAUCAGACUUUGCGCCAUCGGGCCGUUGUCGACGGAAUAAACCCAC<br>AUGUUGCGCUUCACCAGUUGGUAGGUCCAGCCGCC                                                                                                                                                                                                                                                                                                                   |
| IS 3   | AGUCAGAGCGUAGUCAGCAUGCUAACAAGCGGCUGGCACGAUUGCUGAUUGCCUGGAAGCUGGAGCAA<br>CAGCAACAGGAAAAUAGCGCGGCUGAAAUCGCAGCGGCGAAUGUCCAUCACCAGAUUGAACGUGGC<br>AACCCGCGACGGACAUUACAGGGGAUGGCUUUUAUCGAAGGAUAAUGAAGGAUGAAACUGCCGGAAGG                                                                                                                                                                                                             |
| IS 4   | AGCGCCGUCGGGCGUUUGGUCGCCCCGUCGAUUUUUGUUUCUACCGUGGUCUGAACGUCAGUGAAGCU<br>UCUGUACUGGUUACGCGCGCUUCCGAUCACAAUCCGCUACUCGUUGAAUUCAGUCCCGGCAAGCCUGAU<br>AAUAAGGUAUGUCAGGUCUGCCACAGGGCAGACCAACGUUUGGCGUCGCGAAAACGUGAGCGCGGU<br>GGUGGCGUAUGACUUAUCUGCCCACAUGCUGGAUGUCGUGGCACAAGCUGCCGAAGCCCGGCAACUGAA<br>AAUAUCACCACCCGCCAGGGAUUGCC                                                                                                     |
| IS 5   | ACUAUCUGAACCAAAUUAUAUCACAUUUCAGCAGGGUUAUUAUUUCUAUAAACCGUUACAUAUAUC<br>GACCUGGUCAAAAUUAUCCUUCUAAACCGAAGGUGAAGGUUGUGGUUGAGUGAAAAUUGAUCAGUAA<br>GGCCAUAGUGCGGUGUAAUUAUAGACAGCUAAUUAAGCUCGUUGCCUCUUGUACUAUUGUUAUUAU<br>UUUGUUUGCUAUAUUGUUUGAAAGUUUUGACAGGAUUGCCAUUAGUAGCAUGAACAAUAGUAAUAA<br>UCUGGAUUAUUUCACUCUCUAUAUCAUUAUUUCCAUUGCAUUUAUGCUGAUCACCCUCCUGGUCAUCC<br>UUAUUGCAAACCCAGUACCGGGCUGGGAGAAGUGCUUGUGACGAUAAAUUUGCUUAAUGCC |

1134

1135 **Table S5:** Enriched hits after NAD captureSeq in *S. aureus* pCG-P3 strain. Base mean: normalised  
1136 mapped reads, Log2FC: Log2 Fold change (sample vs negative control). In bold are highlighted  
1137 the common hits to *S. aureus* ATCC 25923 wild type strain (Table S2) and in regular font the non-  
1138 common hits.

| Gene annotation number | Gene product                                              | Base mean      | Log2FC      | P-value      |
|------------------------|-----------------------------------------------------------|----------------|-------------|--------------|
| <b>SAOUHSC_00086</b>   | <b>3-ketoacyl-acyl carrier protein reductase putative</b> | <b>60.65</b>   | <b>2.49</b> | <b>0.000</b> |
| <b>SAOUHSC_00861</b>   | <b>Lipoyl synthase</b>                                    | <b>32.35</b>   | <b>3.85</b> | <b>0.000</b> |
| <b>SAOUHSC_01685</b>   | <b>Heat-inducible transcription repressor HrcA</b>        | <b>127.01</b>  | <b>2.84</b> | <b>0.000</b> |
| <b>SAOUHSC_02260</b>   | <b>Delta-hemolysin precursor/RNAIII</b>                   | <b>5338.08</b> | <b>2.77</b> | <b>0.000</b> |
| SAOUHSC_00467          | Pur operon repressor                                      | 24.92          | 2.12        | 0.000        |
| SAOUHSC_01191          | 50S ribosomal protein L28                                 | 18.24          | 2.28        | 0.000        |
| SAOUHSC_01432          | Peptide methionine sulfoxide reductase                    | 13.50          | 3.53        | 0.000        |
| SAOUHSC_01493          | 30S ribosomal protein S1 putative                         | 36.32          | 2.05        | 0.000        |
| SAOUHSC_01997          | Peroxide-responsive repressor PerR                        | 28.14          | 2.07        | 0.000        |
| SAOUHSC_02019          | Probable autolysin LytO                                   | 203.90         | 2.52        | 0.000        |
| SAOUHSC_02409          | Arginase                                                  | 13.34          | 5.09        | 0.000        |

1139

1140 **Table S6:** Enriched hits after NAD captureSeq in *S. aureus* pCG-P3(-1G) strain. Base mean:  
1141 normalised mapped reads, Log2FC: Log2 Fold change (sample vs. negative control). In bold are  
1142 highlighted the common hits to *S. aureus* ATCC 25923 wild type strain (Table S2) and in regular  
1143 font the non-common hits.

| Gene annotation number | Gene product                                              | Base mean       | Log2FC      | P-value      |
|------------------------|-----------------------------------------------------------|-----------------|-------------|--------------|
| <b>SAOUHSC_00086</b>   | <b>3-ketoacyl-acyl carrier protein reductase putative</b> | <b>300.15</b>   | <b>3.06</b> | <b>0.000</b> |
| <b>SAOUHSC_00781</b>   | <b>HPr kinase/phosphorylase</b>                           | <b>31.15</b>    | <b>3.96</b> | <b>0.000</b> |
| <b>SAOUHSC_01176</b>   | <b>Guanylate kinase</b>                                   | <b>12.58</b>    | <b>2.53</b> | <b>0.000</b> |
| <b>SAOUHSC_01617</b>   | <b>Arginine repressor</b>                                 | <b>22.34</b>    | <b>2.28</b> | <b>0.000</b> |
| <b>SAOUHSC_01685</b>   | <b>Heat-inducible transcription repressor HrcA</b>        | <b>184.56</b>   | <b>2.50</b> | <b>0.000</b> |
| <b>SAOUHSC_02260</b>   | <b>Delta-hemolysin precursor</b>                          | <b>16912.85</b> | <b>3.57</b> | <b>0.000</b> |
| <b>SAOUHSC_02577</b>   | <b>Putative 2-hydroxyacid dehydrogenase</b>               | <b>66.55</b>    | <b>2.07</b> | <b>0.000</b> |
| SAOUHSC_01191          | 50S ribosomal protein L28                                 | 67.43           | 2.27        | 0.000        |
| SAOUHSC_01653          | Superoxide dismutase 1                                    | 63.09           | 3.30        | 0.000        |
| SAOUHSC_01981          | Sensor histidine kinase putative                          | 16.93           | 5.07        | 0.000        |
| SAOUHSC_02019          | Probable autolysin LytO                                   | 3110.21         | 3.23        | 0.000        |
| SAOUHSC_02409          | Arginase                                                  | 26.68           | 3.04        | 0.000        |

1144

1145 **Table S7:** Enriched hits after NAD captureSeq in *S. aureus* pCG-P2 strain. Base mean: normalised  
1146 mapped reads, Log2FC: Log2 Fold change (sample vs negative control). In blue are highlighted  
1147 the common hits to *S. aureus* ATCC 25923 wild type strain (Table S2) and in green the non-  
1148 common hits. Note that *hld*/RNAIII gene is not enriched in this table because due to its +1G  
1149 condition.

| Gene annotation number | Gene product                                              | Base mean    | Log2FC      | P-value      |
|------------------------|-----------------------------------------------------------|--------------|-------------|--------------|
| <b>SAOUHSC_00086</b>   | <b>3-ketoacyl-acyl carrier protein reductase putative</b> | <b>47.53</b> | <b>2.68</b> | <b>0.000</b> |
| <b>SAOUHSC_00861</b>   | <b>Lipoyl synthase</b>                                    | <b>16.34</b> | <b>3.30</b> | <b>0.000</b> |
| <b>SAOUHSC_01685</b>   | <b>Heat-inducible transcription repressor HrcA</b>        | <b>71.22</b> | <b>2.81</b> | <b>0.000</b> |
| SAOUHSC_01191          | 50S ribosomal protein L28                                 | 17.10        | 2.11        | 0.000        |
| SAOUHSC_01997          | Peroxide-responsive repressor PerR                        | 18.60        | 2.19        | 0.000        |
| SAOUHSC_02019          | Probable autolysin LytO                                   | 125.51       | 3.02        | 0.000        |

1150



1151 **Table S8:** pCG-P3 vs pCG-P3(-1G) transcriptomic analysis. Base mean: normalised mapped reads,  
1152 Log2FC: Log2 Fold change (sample vs negative control). Negative Log2 Fold change values  
1153 indicate downregulation, whereas positive values account for upregulated genes.

| Gene annotation number | Gene product                              | Base mean | Log2 Fold change | P-value |
|------------------------|-------------------------------------------|-----------|------------------|---------|
| SAOUHSC_00069          | Protein A                                 | 94209.43  | -1.41            | 0.000   |
| SAOUHSC_01938          | Serine protease SplD                      | 502.55    | 1.06             | 0.000   |
| SAOUHSC_01939          | Serine protease SplC                      | 547.92    | 1.15             | 0.000   |
| SAOUHSC_01941          | Serine protease SplB                      | 584.74    | 1.19             | 0.000   |
| SAOUHSC_01942          | Serine protease SplA                      | 497.76    | 1.12             | 0.000   |
| SAOUHSC_02576          | Secretory antigen precursor SsaA putative | 560.25    | -1.28            | 0.000   |

1154

1155 **Table S9: Bacterial strains used in this study**

| Bacterial strain                                                                                    | Source                                  |
|-----------------------------------------------------------------------------------------------------|-----------------------------------------|
| <i>Staphylococcus aureus</i> subsp. <i>aureus</i> ATCC 25923                                        | American Type Culture Collection (ATCC) |
| <i>Escherichia coli</i> K-12                                                                        | Lab strain collection                   |
| <i>Staphylococcus aureus</i> subsp. <i>aureus</i> RN4220                                            | Charpentier <i>et al.</i> , 2004        |
| <i>Staphylococcus aureus</i> subsp. <i>aureus</i> HG001                                             | Herbert <i>et al.</i> , 2010            |
| <i>Staphylococcus aureus</i> subsp. <i>aureus</i> HG001 $\Delta$ RNAIII                             | This study                              |
| <i>Staphylococcus aureus</i> subsp. <i>aureus</i> HG001 $\Delta$ RNAIII, $\Delta$ psm $\alpha\beta$ | This study                              |
| <i>Staphylococcus aureus</i> subsp. <i>aureus</i> HG001 $\Delta$ RNAIII pCG-P3                      | This study                              |
| <i>Staphylococcus aureus</i> subsp. <i>aureus</i> HG001 $\Delta$ RNAIII pCG-P2                      | This study                              |
| <i>Staphylococcus aureus</i> subsp. <i>aureus</i> HG001 $\Delta$ RNAIII pCG-P3(-1G)                 | This study                              |

1156

1157 **14 Supplementary figures**

1158

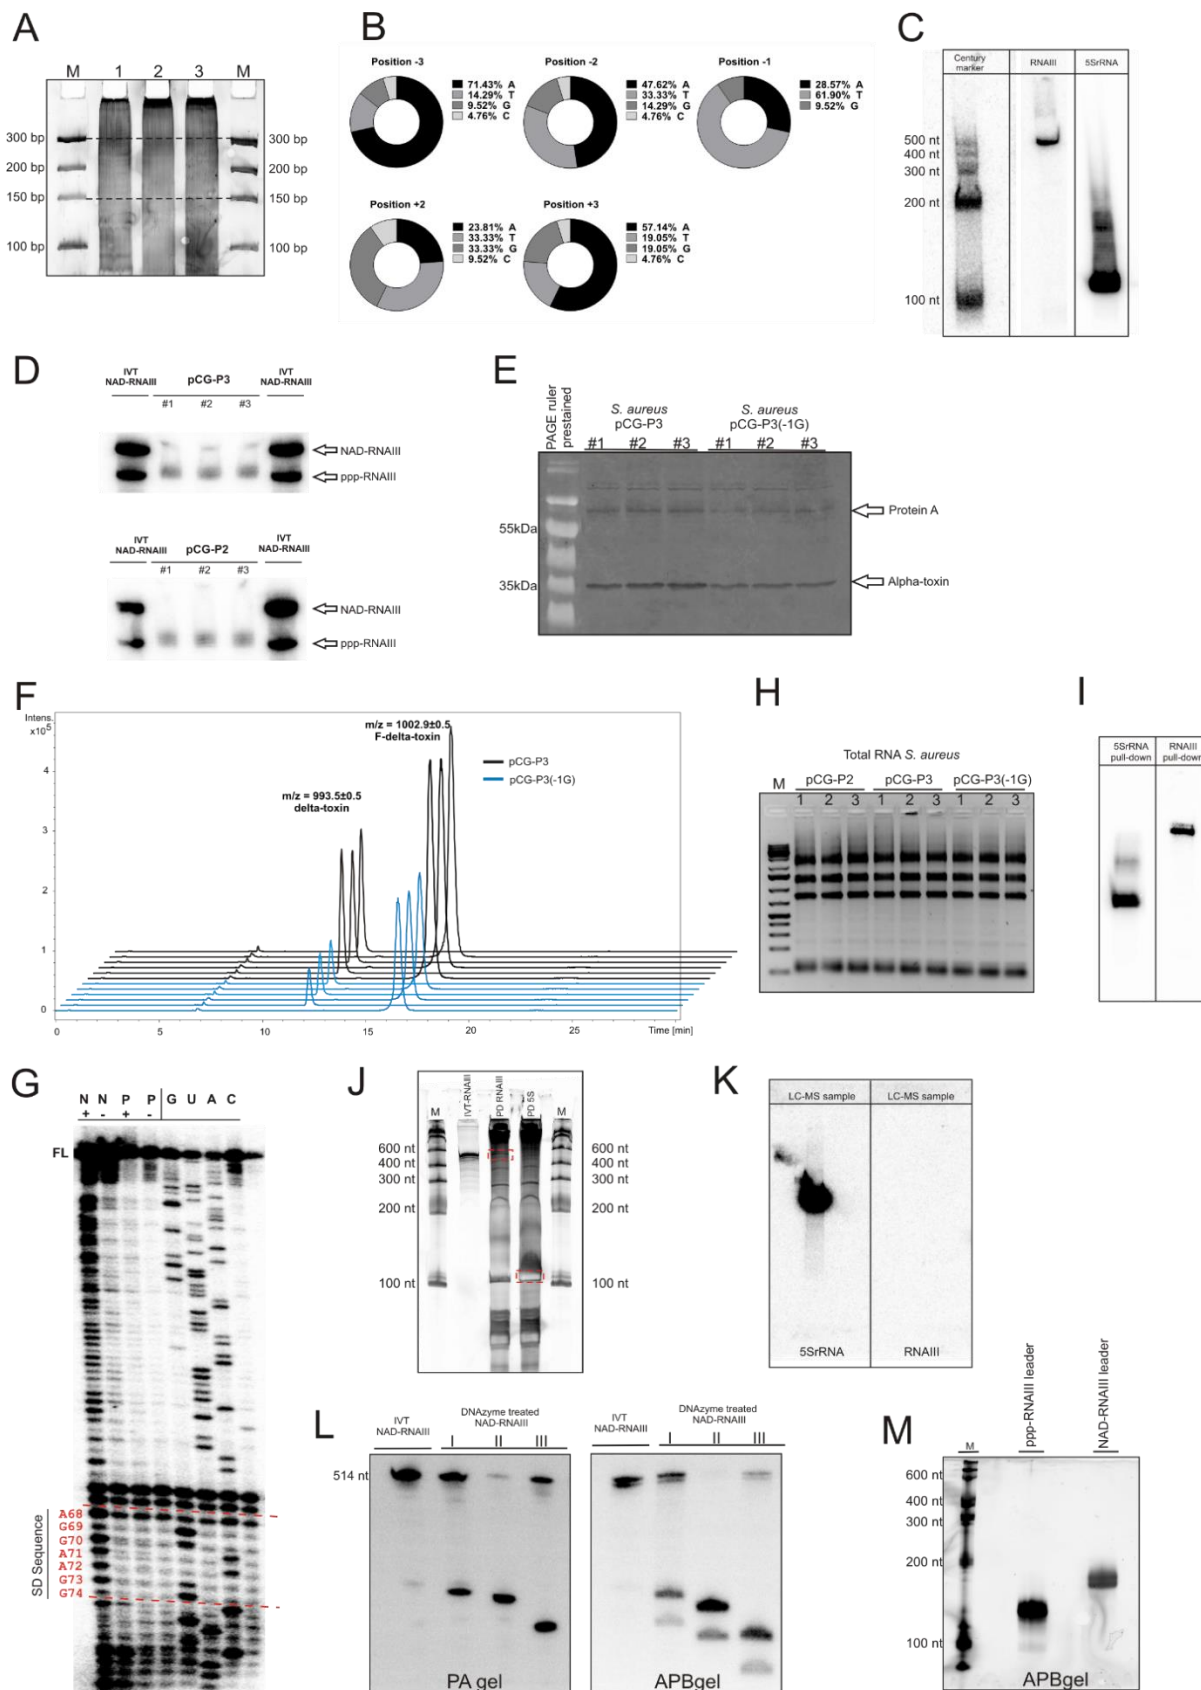

1159  
1160

Figure S1

1161 15
